# Supplementary material
Source: HighWire-hosted journal article supplement (http://www.cfp.ca/highwire/filestream/32653/field_highwire_adjunct_files/1/832_DeprescribingAntihyperglycemics_Appendix.pdf)
Supplement: 832_DeprescribingAntihyperglycemics_Appendix.pdf [file 832_DeprescribingAntihyperglycemics_Appendix.pdf]

**Appendix 1. Expertise, roles and responsibilities, and conflicts of interest for the guideline development team members and staff**

| Name                                      | Expertise                                                                                        | Guideline Role and Section Responsibilities                                                                                                                            | Conflict(s) of Interest                                                                                                                                                                                                                                                   |
|-------------------------------------------|--------------------------------------------------------------------------------------------------|------------------------------------------------------------------------------------------------------------------------------------------------------------------------|---------------------------------------------------------------------------------------------------------------------------------------------------------------------------------------------------------------------------------------------------------------------------|
| <b>Guideline development team members</b> |                                                                                                  |                                                                                                                                                                        |                                                                                                                                                                                                                                                                           |
| Barbara Farrell                           | Pharmacist (Geriatric Day Hospital, lead on the Deprescribing guidelines in the elderly project) | <ul style="list-style-type: none"> <li>• Overall lead</li> <li>• Introduction</li> <li>• Recommendations</li> <li>• Gaps in knowledge</li> <li>• Conclusion</li> </ul> | Received research funding for the purposes of developing this guideline; received financial payments from Institute for Healthcare Improvement and Commonwealth Fund for deprescribing guideline summary and from Ontario Pharmacists Association for speaking engagement |
| Manon Bouchard                            | Nurse practitioner (Family Health Team)                                                          | <ul style="list-style-type: none"> <li>• Resource implications</li> <li>• Patient values and preferences</li> </ul>                                                    | None declared                                                                                                                                                                                                                                                             |
| Heather Lochnan                           | Endocrinologist                                                                                  | <ul style="list-style-type: none"> <li>• Clinical considerations</li> <li>• Other guidelines</li> </ul>                                                                | Member of CDA; has received funding and participated in multi-centre diabetes clinical trials with sponsorship from pharmaceutical companies that produce agents for management of diabetes                                                                               |
| Lisa McCarthy                             | Pharmacist (community and primary care settings)                                                 | <ul style="list-style-type: none"> <li>• Review of reviews of harms</li> </ul>                                                                                         | Former member of the CDA, Diabetes Educator Section                                                                                                                                                                                                                       |
| Carlos Rojas-Fernandez                    | Pharmacist (geriatrics, primary and long-term care settings)                                     | <ul style="list-style-type: none"> <li>• Clinical considerations</li> <li>• Other guidelines</li> </ul>                                                                | None declared                                                                                                                                                                                                                                                             |
| Salima Shamji                             | Family Physician (Care of the elderly, primary and long-term care settings)                      | <ul style="list-style-type: none"> <li>• Review of reviews of harms</li> </ul>                                                                                         | None declared                                                                                                                                                                                                                                                             |
| Ross Upshur                               | Family physician                                                                                 | <ul style="list-style-type: none"> <li>• Patient values and preferences</li> </ul>                                                                                     | None declared                                                                                                                                                                                                                                                             |
| Vivian Welch                              | Clinical                                                                                         | <ul style="list-style-type: none"> <li>• Summary of findings</li> </ul>                                                                                                | None declared                                                                                                                                                                                                                                                             |

|                        |                                                                     |                                                                                                                                                                                                                  |               |
|------------------------|---------------------------------------------------------------------|------------------------------------------------------------------------------------------------------------------------------------------------------------------------------------------------------------------|---------------|
|                        | epidemiology<br>methodologist                                       | and quality of<br>evidence <ul style="list-style-type: none"> <li>• GRADE review</li> <li>• Gaps in knowledge</li> </ul>                                                                                         |               |
| <b>Support persons</b> |                                                                     |                                                                                                                                                                                                                  |               |
| Cody Black             | Staff                                                               | <ul style="list-style-type: none"> <li>• Guideline coordinator</li> <li>• Summary of findings<br/>quality of evidence</li> <li>• Resource Implications</li> </ul>                                                | None declared |
| Wade Thompson          | Pharmacist (Long-term care), Masters Student, Clinical Epidemiology | <ul style="list-style-type: none"> <li>• Summary of findings<br/>and quality of<br/>evidence</li> <li>• GRADE review</li> <li>• Patient values and<br/>preferences</li> <li>• Clinical considerations</li> </ul> | None declared |

## **Appendix 2. Evidence Reviews and Related References**

### **Summary of Systematic Review Findings**

Two controlled before-after studies, were eligible for systematic review [1,2]. Risk of bias for both studies was assessed using the Cochrane ACROBAT tool [3]. We could not meta-analyze these studies due to heterogeneity in study design and intervention.

The first study investigated deprescribing glyburide (discontinuing glyburide and switching to an alternative agent, or discontinuing glyburide and not adding additional medication) in outpatient veterans over 65 years of age (mean age 77 years, 32% with diabetic complications) with renal insufficiency via an educational intervention delivered through pharmacists to prescribers [1]. Pharmacists were provided with a list of patients receiving glyburide to be targeted (n=4368) as the intervention group for discussion with prescribers, while non-targeted patients (n=1886) served as controls. Patients in the intervention group were more likely to stop glyburide (RR: 1.28; 95% CI: 1.22, 1.33) compared with the control group. Baseline to post-intervention A1C was compared in intervention patients who continued glyburide to those discontinuing glyburide who did not start another medication. There was no significant difference in A1C in the group who discontinued glyburide compared with those who continued (A1C increased by 0.04% in those discontinuing glyburide (A1C  $7.11 \pm 1.33$  before,  $7.15 \pm 1.34$  after) versus 0.06% in those who continued (A1C  $7.16 \pm 1.25$  before,  $7.22 \pm 1.32$  after); mean difference: 0.02% lower; 95% CI: -0.16, 0.12%;). Change in A1C was reported for patients (n=999) switched from glyburide to alternative medications. In patients who were switched to alternative medications, the pre and post-intervention A1C values were  $7.29 \pm 1.37$  and  $7.33 \pm 1.41$ . Approximately 87% of these patients were switched to glipizide. No significant difference was observed in rates of hypoglycemia post-intervention between the intervention

and control groups (RR: 1.08; 95% CI: 0.78, 1.5). These results suggest that an educational intervention can decrease glyburide use (through discontinuation, or switching to glipizide) without compromising glucose control or reducing hypoglycemic events in community-dwelling older adults. The certainty of evidence for this study was graded as very low due to its observational design and concerns surrounding risk of bias, rated as serious, and imprecision.

The second study [2] investigated withdrawal of all antihyperglycemics (or reducing insulin to 20 units per day for patients on a baseline dose >20 units per day) (n=32) versus continuing antihyperglycemics (n=66) in Swedish nursing home patients (mean age 84 years) with tight glycemic control. The baseline A1C was 5.2% (SD 0.4) in the intervention group and 7.1% (SD 1.6) in the continuation group. The change in A1C was not significantly higher in the intervention group (MD: 1.1%; 95% CI: -0.56, 1.64%). There was no significant difference in mortality between the deprescribing group and continuation group (RR 0.74, 95% CI 0.29 to 1.87). Three patients in the deprescribing group had therapy reintensified following study-related glucose monitoring between 16.6 and 18.3mmol/L. Results of this study suggest that deprescribing antihyperglycemics in elderly nursing home patients with tight glycemic control does not result in clinically significant A1C increases, and with glucose monitoring, is feasible and safe. No data were provided regarding hypoglycemia risk before and after the intervention. The certainty of evidence was graded as very-low due to the study's observational design, and concerns over risk of bias, rated as serious, and imprecision.

Overall, this systematic review suggests that it is not harmful to stop or substitute glyburide in community-dwelling elderly patients [4]. Reducing insulin and/or stopping other antihyperglycemics in nursing home patients with tight glycemic control also appears to be safe.

Neither intervention reduced the risk of hypoglycemia. Summary of findings tables are presented in CFPlus Appendix 3.

## **Benefits and harms of continued antihyperglycemics use**

### **Benefits**

The benefits of Type 2 Diabetes treatment include control of symptomatic hyperglycemia and avoidance of microvascular and macrovascular complications. In older adults, avoidance of sustained hyperglycemia is important to minimize risk of osmotic diuresis, causing polydipsia, polyuria and nocturia, which can result in dehydration, interrupted sleep, falls and associated complications. Wound healing [5] and cognition may also be negatively affected by hyperglycemia [6,7] though improvement in the latter has not been demonstrated with tight vs. standard control [8]. In the absence of large scale intervention studies in older people with Type 2 Diabetes or large scale studies of residents in long-term care facilities, we extrapolate evidence from studies completed with younger adults. Reduction in risk of diabetes-related microvascular complications (e.g. retinopathy progression and albuminuria) and macrovascular complications (e.g. non-fatal myocardial infarction) over 5 to 10+ years of treatment, have been demonstrated [9–12], while there have been reports of glucose-lowering drugs or strategies demonstrating benefit in the reduction of major cardiovascular events [13]. Reductions in the composite endpoint of cardiovascular mortality, non-fatal MI and stroke, and hospitalization for heart failure were recently observed in a clinical trial of empagliflozin versus placebo after 3 years of treatment in patients with established cardiovascular disease[14]. Benefits and risks

associated with pharmacologic management with diabetes are described in detail in the Canadian Diabetes Association's (CDA) Clinical Practice Guidelines [15]. The place of each drug class, including empagliflozin, in the treatment of diabetes, is reviewed in the 2016 update [16].

Recent trials that have included older adults in examining tight glycemic control (targeting A1C <6 or 6.5% vs. 7 to <7.9%) have not found significant differences in macrovascular outcomes; indeed, all-cause mortality was increased in the tight glycemic control group [10,17,18].

Therefore, in older adults, who are otherwise healthy, have good cognitive and physical function, are not at risk of falls and have substantial life expectancy (e.g. >10 years for most treatments), diabetes goals consistent with younger adults (e.g. A1C  $\leq$ 7%, as per CDA[19], or 7-7.5% as per the International Diabetes Federation[20] and American Geriatrics Society[21]) should be considered to attain the benefit of microvascular risk reduction.

The micro and macrovascular benefits of Type 2 Diabetes treatment and optimal targets in the frail elderly, those with advanced diabetes complications, those with dementia or are nearing end-of-life, are less clear. The mean age of patients in most large randomized controlled trials is between 54 and 66 years [10,17,18,22]. As no randomized controlled trials assessing the effects of tight glycemic control have included frail elderly patients the clinical meaningfulness of microvascular risk reduction remains uncertain [23].

## **Harms**

Harms attributable to antihyperglycemic medications may be categorized as hypoglycemia and its immediate sequelae, and other adverse events associated with continued antihyperglycemic use.

### Hypoglycemia: scope and implications

Hypoglycemia manifests in younger adults with adrenergic symptoms such as sweating, tremor and palpitations. In older adults, symptoms are more commonly neuroglycopenic in nature resulting in dizziness, weakness, delirium and confusion[24].

In the context of conventional versus tight glycemic control, older adults, in particular the frail elderly, are at higher risk for hypoglycemia and its consequences[25,26], and such risks are generally considered to outweigh the benefits of tight glycemic control [26–29]. For example, impaired hepatic and renal function can result in reduced gluconeogenesis and renal clearance of antihyperglycemics such as insulin and sulfonylureas; decreased nutrient intake can exaggerate the effects of antihyperglycemics. Autonomic neuropathy and decreased beta-receptor responsiveness can result in absence of typical hypoglycemic symptoms such as diaphoresis, tachycardia and tremor, and patients may thus be unaware of hypoglycemia. As a result of cognitive or physical impairment, patients may be limited in their ability to respond to hypoglycemia by seeking treatment. Comorbid conditions, polypharmacy and history of hypoglycemia have all been shown to increase risk of hypoglycemia. Drug interactions resulting in hypoglycemia are also an important consideration. For example, alcohol [30], monoamine oxidase inhibitors[31] and salicylates[32] can trigger hypoglycemia, while beta-blockers[33,34] can mask common signs and symptoms of hypoglycemia (except sweating) and trimethoprim/sulfamethoxazole can increase serum concentrations of sulfonylureas and repaglinide[36,37]. It is also important to consider the higher propensity of certain antihyperglycemics (e.g., sulfonylureas, insulin and meglitinides) to cause hypoglycemia [37].

Hypoglycemic episodes in older adults may be severe, leading to impaired cognitive and physical function, falls and fractures, motor vehicle accidents, seizures, emergency room visits, hospitalisations and an increase in mortality risk [38–41]. Recent controlled studies have likewise demonstrated harm, and limited to no benefit associated with tighter (i.e., from <6% or <6.5% vs. 7 to 7.9%) glucose control in people aged 60-66 years [9,16,17]. An increased risk for hypoglycemia was observed in one study when A1C levels were managed according to American Geriatrics Society guidelines (A1C <8%), increasing from 1.1 episodes per 100 patient years to 2.9 episodes per 100 patient years ( $p=0.03$ ) in a retrospective case-control study [39]. Similar findings were noted by Nelson et al., who observed that compared with patients aged 75 years or older whose A1C were >7%, those with A1C <7% had an increased risk for falls (OR 2.71, 95% CI 1.1,6.7), and the risk was present regardless of the patient's frailty status [42].

Tight glucose control has also been associated with adverse cognitive effects vis a vis hypoglycemia. Studies have documented an increased risk for cognitive impairment and dementia in adults who experience one or more episodes of severe hypoglycemia, and the risk of hospitalization due to hypoglycemia is three times higher in those with dementia.[22,43] In addition, improved functional outcomes were observed in community dwelling older people with diabetes eligible for nursing home care whose A1C levels were between 8-8.9% vs 7-7.9% [44].

The potential population exposed to hypoglycemia related harm from tight control is large. In a cross-sectional study of 1288 older adults ( $\geq 65$  years of age) with diabetes from the National Health and Nutrition Examination Survey from 2001 to 2010, 61.5% (95% CI, 67.5%-65.3%)



had an A1C of less than 7%. Of those older adults with an A1C less than 7%, 54.9% (50.4%-59.3%) were treated with insulin or sulfonylureas [47].

### *Adverse Effects Associated with Specific Medication Classes*

To provide a comprehensive overview of harms associated with antihyperglycemics, we undertook a review of reviews. This approach highlights important harm considerations but does not explore detailed mechanisms or controversies associated with clinical importance. A librarian developed search strategies (available by request) for Ovid Medline and the Cochrane Library for English-language systematic reviews of randomized trials or observational studies presenting associations between antihyperglycemics and harms. Two investigators independently reviewed these results and identified relevant literature. Study design, outcomes and effect sizes were extracted from the relevant studies. CFPlus Appendix 3 summarizes our findings. When weighing the risks and benefits of a particular medication, we encourage readers to consider the effect size for the increased risk in the context of how frequently the medication is used and the patient's baseline risk. In addition when interpreting the evidence for harms, it is important to remember that many of the studies included in systematic reviews were observational studies where residual confounding cannot be completely eliminated.

### *Metformin*

Metformin is associated with vitamin B12 deficiency but not lactic acidosis.[46,47] The risk of lactic acidosis with metformin, even in the presence of renal insufficiency, is estimated to fall between 3 and 10 per 100,000 person-years, which Inzucchi et al report is similar to the rate

with people living with diabetes in general [50]. Wu et al (2015) found metformin use was associated with decreased cancer incidence and cancer-related mortality [51].

### *Insulin*

Zhao et al observed an association between insulin use and diabetic retinopathy,[50] though it is known that glucose control reduces retinopathy in the long-term. Zhang et al. identified a strong association with macular edema and insulin use [53]. In systematic reviews, overall cancer has been linked to insulin,[49,52] but not cancer-related mortality [51]. Singh et al identified an association with hepatocellular cancer.[53] Conflicting findings were reported for studies exploring associations between insulin and colorectal[52,54–56] and pancreatic cancer.[52,57] However, in the ORIGIN trial, which examined use of insulin glargine compared to standard care for a median 6 years, there were no significant differences in overall cancer (HR 1.00; 95% CI, 0.88 to 1.13), cancer-related deaths (HR 0.94, 95% CI, 0.77-1.15) or cancer at specific sites (breast, lung, colon, prostate, melanoma etc.).[58]

### *Sulfonylureas (e.g. glyburide, chlorpropamide, glibenclamide)*

Sulfonylureas are associated with all-cause mortality,[59,60] though conflicting findings have been observed with respect to cardiovascular mortality,[59,61], stroke,[60,61] and cancer [49,53,56,57,62]. Heart failure risk was increased when compared with metformin,[63] while myocardial infarction,[60] and nervous system reactions (dizziness, anxiety, insomnia and vertigo) were not in studies comparing sulfonylureas and placebo.[64] Hypoglycemia risk is greatly increased when sulfonylureas are used with metformin compared with metformin

monotherapy.[64] Glyburide and chlorpropamide are considered potentially inappropriate medications for the elderly in both the Beers[65] and STOPP/START[66] criteria due to increased risk of hypoglycemia compared to other secretagogues and sulfonylureas [67]. Due to these risks, both sets of criteria state that glyburide and chlorpropamide should be avoided in older adults (strong recommendation, very low quality evidence). Chan et al found that gliclazide demonstrated similar HbA1c reductions but carried a lower risk of hypoglycemia compared to other sulfonylureas (i.e., glibenclamide, glimepiride) [70].

*Thiazolidinediones (e.g. pioglitazone, rosiglitazone)*

Thiazolidinediones have been associated with reduced hip [69], and lumbar spine bone mineral density [69], as well as fractures in women [69,70]. Heart failure [12,63,71,72], edema [71,73], and pneumonia or lower respiratory tract infections are known adverse effects [74]. Myocardial infarction has been noted in two studies [72,75], and one of these studies found no increased risk for cardiovascular death [75]. Loke reported a small increased risk for mortality [72].

Contradictory conclusions exist with respect to bladder cancer [76–80]. Five systematic reviews have examined this risk but all included different original studies. Wu et al. found an increased incidence of all cancer but not in cancer-related mortality [51]. No association with pancreatitis [81], or hypoglycemia (when used in combination with insulin) has been identified [82]. With respect to differences between the agents in the class, Pladevall et al found an increased risk of acute myocardial infarction and stroke for rosiglitazone when compared to pioglitazone [85].

*Meglitinides (e.g. repaglinide) and Alpha-glucosidase inhibitors (e.g. acarbose)*

Hypoglycemia was not associated with repaglinide both when used in combination with metformin (compared to metformin alone) [84], and compared to sulfonylureas [85]. One retrospective study (not a systematic review) examined an association with cardiovascular mortality but no effect was noted [86]. Acarbose is associated with gastrointestinal adverse effects including flatulence and diarrhea [85,87] and a small increased risk of cancer in one recent study[51].

*DPP-4 inhibitors (e.g. sitagliptin), GLP-1 agonists (e.g. exenatide), sodium-glucose cotransporter 2 inhibitors (e.g. empaglifozin)*

DPP-4 inhibitors, GLP-1 agonists, and sodium-glucose cotransporter 2 inhibitors have been the focus of several systematic reviews. An association between DPP-4 inhibitors and heart failure has been observed [12,88,89]. Conflicting findings are noted for hypoglycemia [92–94], pancreatitis [95,96] and stroke [91,97,98].

Links between GLP-1 agonists and acute pancreatitis [94,97–100], cancer [49,97], fractures [101–103], and nasopharyngitis have been explored but no significant associations have been found [104,105]. Reports of gastrointestinal side effects including diarrhea, nausea and vomiting are noted, particularly with dulaglutide [107,108].

Sodium-glucose cotransporter 2 inhibitors have demonstrated reductions in major cardiovascular events, cardiovascular mortality, and all cause mortality[109]. Associations with genital tract infections have been widely explored and all but one author [110] have found an increased risk [92,107,109–115]. Adverse effects related to osmotic diuresis are reported in some but not all studies(e.g., diarrhea, pollakiuria [i.e., daytime urinary frequency]) [92,110,112]. Conflicting findings are also noted for urinary tract infections

[94,109,110,114,115] and hypoglycemia [92,107–111,113,115]. Concerns about severe dehydration and acidosis requiring hospitalization are supported by some, but not all authors [13,107,116].

### **Values and patient preferences related to antihyperglycemics**

Hypoglycemia is a major concern for people with diabetes. Cross-sectional studies of over 7000 people with type 2 diabetes, with a mean age range of 58-63 years [119–122] suggest that patient-reported quality of life is significantly lower for those experiencing hypoglycemia compared with those who do not. Quality of life may worsen with increasing hypoglycemia severity [119,121] and function may be negatively affected [122]. Patients experiencing hypoglycemia are less satisfied with treatment, and perceive therapy as more burdensome compared with those not experiencing hypoglycemia [117].

The potential burden of diabetes treatment should be considered in the context of patient/caregiver goals and values [123,124]. Survey data suggests patients view insulin and frequent glucose self-monitoring to be burdensome (n=1653, mean age 64 years)[125] and interviews have found intensive therapy may be associated with a decreased quality of life compared with standard treatment in older persons (n=701, mean age 69 years,) [126]. Semi-structured interviews (n=28, mean age 74 years) suggest that older patients with diabetes place greater value on maintaining independence and social function rather than controlling risk or preventing complications [127]. Conversely, a randomized controlled trial in 153 male veterans reported no difference in patient-reported quality of life or perceived health status for patients receiving intensive blood glucose management compared to standard treatment [128]. However, this trial was conducted in younger male patients (40-69 years of age, mean age 60 years); thus, these results may not reflect attitudes of older, more complex, frail patients. In a qualitative

study of 21 caregivers of patients with dementia and diabetes, caregivers reported that caring for these patients was highly burdensome and that they required additional family and health care provider support [131].

There is likely heterogeneity in older patients' preferences in goals with respect to type 2 diabetes management. A survey of 473 patients with diabetes (mean age 74 years of age) found much variation in treatment preferences (tight versus conservative) and patient ratings of the importance of potential complications [130]. There was also variation in the perception of the impact of intensive treatment on quality of life and time trade-offs with respect to intensive treatment and reducing risk of complications [130].

In summary, some older adults may prefer intensive glucose control, while others may prefer less intensive therapy. Some patients feel that pursuing aggressive A1C targets is burdensome and reduces quality of life, and intensive therapy does not appear to improve patient perceived health status. Intensive therapy increases the risk of hypoglycemia, reducing quality of life and adversely impacting function and satisfaction with care. Treatment preferences and goals should be discussed with patients, and treatment should be tailored accordingly.

### **Resource implications and cost-effectiveness**

In a 2011 report from the Public Health Agency of Canada, the prevalence of diabetes was estimated at 6.8% of the population steadily rising with age, affecting >20% of Canadian seniors [131]. Type 2 Diabetes is estimated to account for greater than 90% of all cases in Canada, and the incidence of type 2 diabetes is increasing [131]. A CDA report on the economic burden of estimated expenditures on diabetes totaled \$12.2 billion in 2010,

accounting for 3.5% of all healthcare expenditures in Canada, nearly doubling from 2000, with costs expected to rise by \$4.7 billion in 2012 [132].

Medications are one of the highest sources of economic burden for diabetes, behind only mortality, long-term disability and hospitalization costs in the general population [132].

Expenditures are different for older adults, with the bulk of costs arising from hospital inpatient stays and medication use [133]. In 2008, \$1.7 billion was spent on diabetes medications in Canada, with seniors accounting for \$670 million (39.9%) of total drug expenditures in this category [131].

The burden of hypoglycemia is an important consideration when evaluating the economic burden and resource implications of Type 2 Diabetes in older people. Persons with hypoglycemia have been shown to have higher annual all-cause and diabetes-related health care costs than those without hypoglycemia (+\$5024 and \$3747 USD, respectively) [134]. An analysis by Boulin et al., found incidence rates of drug-induced hypoglycemia were highest for both insulin and sulfonylureas, 8.64 and 4.32 events per person-year respectively in 65-79 year olds, and 12.06 and 6.03 events per person-year for persons aged 80 years or older. These rates of hypoglycemia, along with drug costs, were the main drivers of their cost-effectiveness model. These results suggest that insulin and sulfonylureas may not be cost-effective due to the risks associated with hypoglycemia and associated events [135].

No studies investigating the benefit of antihyperglycemic medications in the frail elderly and those with limited time to benefit, tight glycemic control in elderly populations or the cost-effectiveness of deprescribing antihyperglycemics were identified.

## References

1. Aspinall SL, Zhao X, Good CB, Stone R a, Boresi J, Cox S et al. Intervention to decrease glyburide use in elderly patients with renal insufficiency. *Am J Geriatr Pharmacother*. Excerpta Medica, Inc.; 2011;9(1):58–68.
2. Sjöblom P, Tengblad A, Löfgren U-B, Lannering C, Anderberg N, Rosenqvist U et al. Can diabetes medication be reduced in elderly patients? An observational study of diabetes drug withdrawal in nursing home patients with tight glycaemic control. *Diabetes Res Clin Pract*. 2008;82(2):197–202.
3. Sterne J, Higgins JPT, Reeves BC, on behalf of the development group for ACROBAT-NRSI. A Cochrane Risk Of Bias Assessment Tool: for Non- Randomized Studies of Interventions (ACROBAT-NRSI). 2014.
4. Black C, Thompson W, Welch V, McCarthy L, Rojas-Fernandez C, Lochnan H et al. Lack of Evidence to Guide Deprescribing of Antihyperglycemics: A Systematic Review. *Diabetes Ther*. 2017;8(1):23–31.
5. Rosenberg C. Wound healing in the patient with diabetes mellitus. *Nurs Clin North AM*. 1990;25(1):247–61.
6. Cukierman-Yaffe T, Gerstein HC, Williamson JD, Lazar RM, Lovato L, Miller ME et al. Relationship between baseline glycemic control and cognitive function in individuals with type 2 diabetes and other cardiovascular risk factors: the action to control cardiovascular risk in diabetes-memory in diabetes (ACCORD-MIND) trial. *Diabetes Care*. 2009;32(2):221–6.
7. Avadhani R, Fowler K, Barbato C, Thomas S, Wong W, Paul C et al. Glycemia and cognitive function in metabolic syndrome and coronary heart disease. *Am J Med*. 2016;128(1):46–55.
8. Launer L, Miller M, Williamson J, Lazar R, Gerstein H, Murray A et al. Effects of intensive glucose lowering on brain structure and function in people with type 2 diabetes (ACCORD MIND): a randomized open-label substudy. *Lancet Neurol*. 2011;10(11):969–77.
9. UK Prospective Diabetes Study (UKPDS). Group Intensive blood-glucose control with sulphonylureas or insulin compared with conventional treatment and risk of complications in patients with type 2 diabetes (UKPDS 33). *Lancet*. 1998;352:837–53.
10. The Advance Collaborative Group. Intensive Blood Glucose Control and Vascular Outcomes in Patients with Type 2 Diabetes. *N Engl J Med*. 2008;358:2560–72.
11. Holman R, Paul S, Bethel M, Matthews DR, Neil HAW. 10-Year Follow-up of Intensive Glucose Control in Type 2 Diabetes. *N Engl J Med*. 2008;359:1577–89.



12. Turnbull F, Abraira C, Anderson R, Byington R, Chalmers J, Duckworth W et al. Intensive glucose control and macrovascular outcomes in type 2 diabetes. *Diabetologia*. 2009;52(11):2288–98.
13. Udell J, Cavender M, Bhatt D, Chatterjee S, Farkouh M, Scirica B. Glucose-lowering drugs or strategies and cardiovascular outcomes in patients with or at risk for type 2 diabetes: a meta-analysis of randomised controlled trials. *Lancet Diabetes Endocrinol*. 2015;3(5):356–66.
14. Zinman B, Wanner C, Lachin J, Fitchett D, Bluhmki E, Hantel S et al. Empagliflozin, Cardiovascular Outcomes, and Mortality in Type 2 Diabetes. *N Engl J Med*. 2015;
15. Canadian Diabetes Association Clinical Practice Guidelines Expert Committee. Canadian Diabetes Association 2013 Clinical Practice Guidelines for the Prevention and Management of Diabetes in Canada. *Can J Diabetes*. 2013;37(Suppl 1):S1–212.
16. Goldenberg R, Clement M, Hanna A, Harper W, Main A, Retnakaran R et al. Pharmacologic Management of Type 2 Diabetes: 2016 Interim Update. *Can J Diabetes*. 2016;1–3.
17. Duckworth W, Abraira C, Moritz T, Reda D, Ph D, Emanuele N et al. Glucose Control and Vascular Complications in Veterans with Type 2 Diabetes. 2009;129–39.
18. Miller ME, Byington RP, Forest W, for the ACCORD study group. Effects of intensive glucose lowering in Type 2 diabetes: The Action to Control Cardiovascular Risk in Diabetes Study Group (ACCORD). *N Engl J Med*. 2008;358:2545–59.
19. Imran SA, Rabasa-Lhoret R, Ross S. Targets for glycemic control. *Can J diabetes*. Canadian Diabetes Association; 2013;37 Suppl 1:S31–4.
20. Sinclair A, Dunning T, Colagiuri S. IDF global guideline for managing older people with type 2 diabetes. Sydney, Australia; 2013.
21. American Geriatrics Society Expert Panel on the Care of Older Adults with Diabetes, Mellitus. Guidelines Abstracted from the American Geriatrics Society Guidelines for Improving the Care of Older Adults with Diabetes Mellitus: 2013 Update. *J Am Ger*. 2014;61(11):2020–6.
22. UK Prospective Diabetes Study (UKPDS). Effect of intensive blood-glucose control with metformin on complications in overweight patients with type 2 diabetes (UKPDS 34). *Lancet*. 1998;352(9131):854–65.
23. Mallery LH, Ransom T, Steeves B, Maded BC, Med PD, Moorhouse P. Evidence-Informed Guidelines for Treating Frail Older Adults With Type 2 Diabetes : From the Diabetes Care Program of Nova Scotia (DCPNS) and the Palliative and Therapeutic Harmonization (PATH) Program. *J Am Med Dir Assoc*. Elsevier Ltd; 2013;14(11):801–8.
24. Thomson F, Masson E, Leeming J, Boulton A. Lack of knowledge of symptoms of hypoglycaemia by elderly diabetic patients. *Age Ageing*. 1991;20:404–6.

25. Meneilly G, Cheung E, Tuokko H. Counterregulatory Hormone Responses to Hypoglycemia in the Elderly Patient with Diabetes. *Diabetes*. 1994;43:403–10.
26. Bremer J, Jauch-Chara K, Hallshmid M, Schmid S, Schultes B. Hypoglycemia Unawareness in Older Compared With Middle-Aged Patients With Type 2 Diabetes. *Diabetes Care*. 2009;32(8):1513–7.
27. Davis KL, Wei W, Meyers JL, Kilpatrick BS, Pandya N. Association between different hemoglobin A1c levels and clinical outcomes among elderly nursing home residents with type 2 diabetes mellitus. *J Am Med Dir Assoc*. Elsevier Ltd; 2014;15(10):757–62.
28. Meneilly G, Knip A, Tessier D. Diabetes in the elderly. *Can Diabetes Assoc 2013 Clin Pract Guidel Prev Manag Diabetes Canada*. 2013. p. S184–90.
29. American Diabetes Association. Older adults. *Diabetes Care*. 2015;38(Suppl 1):S67–9.
30. The Origin Trial Investigators. Predictors of Nonsevere and Severe Hypoglycemia During Glucose-Lowering Treatment With Insulin Glargine or Standard Drugs in the ORIGIN Trial. *Diabetes Care*. 2015;38(1):22–8.
31. Freinkel N, Singer DL, Arky RA, Sheldon J, Anderson JB, Silbert CK. Alcohol hypoglycemia. I. Carbohydrate metabolism of patients with clinical alcohol hypoglycemia and the experimental reproduction of the syndrome with prue ethanol. *J Clin Ivestig*. 1963;42(7):1112–33.
32. McIntyre RS, Soczynska JK, Konarski JZ, Kennedy SH. The effect of antidepressants on glucose homeostasis and insulin sensitivity: synthesis and mechanisms. *Expert Opin Drug Saf*. 2006;5(1):157–68.
33. Goldfine A, Fonseca V, Jablonski K, Pyle L, Staten MA, Shoelson SE et al. The effects of salsalate on glycemic control in patients with Type 2 Diabetes. *Ann Intern Med*. 2010;152(6):346–57.
34. Deacon SP, Barnett D. Comparison of atenolol and propranolol during insulin-induced hypoglycaemia. 1976;(July):272–3.
35. Deacon SP, Karunanayake A, Barnett D. Acebutolol , atenolol , and propranolol and metabolic responses to acute hypoglycaemia in diabetics. 1977;(November):1255–7.
36. Johnson J, Dobmeier M. Symptomatic hypoglycemia secondary to a glipizide-trimethoprim/sulfamethoxazole drug interaction. *DICP*. 1990;24(3):250–1.
37. Niemi M, Kajosaari L, Neuvonen M, Backman J, Neuvonen P. The CYP2C8 inhibitor trimethoprim increases the plasma concentrations of repaglinide in healthy subjects. *B J Clin Pharmacol*. 2004;57(4):441–7.
38. Harper W, Clement M, Goldenberg R, Hanna A, Main A, Retnakaran R et al. Pharmacologic management of type 2 diabetes. *Can J Diabetes*. Canadian Diabetes Association; 2013;37(Suppl 1):S61–8.

39. Abdelhafiz A, Rodriguez-Manas L, Morley J, Sinclair A. Hypoglycemia in Older People - A Less Well Recognized Risk Factor for Frailty. *Aging Dis.* 2015;6(2):156–67.
40. Lee S, Boscardin W, Cenzer I, Huang E, Rice-Trumble K, Eng C. The Risks and Benefits of Implementing Glycemic Control Guidelines in Frail Older Adults with Diabetes Mellitus. *J Am Geriatr Soc.* 2011;59(4):666–72.
41. McCoy R, Van Houten H, Ziegenfuss J, Shah N, Wermers R, Smith S. Increased mortality of patients with diabetes reporting severe hypoglycemia. *Diabetes Care*. 2012;35:1897–901.
42. Zoungas S, Patel A, Chalmers J, Al. E. Severe hypoglycemia and risks of vascular events and death. *N Engl J Med.* 2010;363:1410–8.
43. Miller ME, Byington RP, Forest W, Bigger JT, Buse JB, Cushman C et al. Effects of intensive glucose lowering in Type 2 diabetes: The Action to Control Cardiovascular Risk in Diabetes Study Group (ACCORD). *N Engl J Med.* 2008;358:2545–59.
44. Nelson JM, Dufraux K, Cook PF. The relationship between glycemic control and falls in older adults. *J Am Geriatr Soc.* 2007;55(12):2041–4.
45. Yaffee K, Falvey C, Hamilton N, Harris T, Simonsick E, Strotmeyer E et al. Association Between Hypoglycemia and Dementia in a Biracial Cohort of Older Adults With Diabetes Mellitus. *JAMA Intern Med.* 2013;173(14):1300–6.
46. Yau C, Eng C, Cenzer I, Boscardin W, Rice-Trumble K, Lee S. Hemoglobin A1C and functional decline in community-dwelling, nursing-home eligible elders with diabetes. *J Am Geriatr Soc.* 2013;60(7):1215–21.
47. Huang E. Potential Overtreatment of Older , Complex Adults With Diabetes. *JAMA Intern Med.* 2015;175(3):356–62.
48. Liu Q, Li S, Quan H, Li J. Vitamin B12 status in metformin treated patients: systematic review. *PLoS One.* 2014;9(6):1–6.
49. Salpeter S, Greyber E, Pasternak G, Salpeter E. Risk of fatal and nonfatal lactic acidosis with metformin use in type 2 diabetes mellitus (Review). *Cochrane Libr.* 2010;(1).
50. Inzucchi S, Lipska K, Mayo H, Bailey C, McGuire D. Metformin in Patients With Type 2 Diabetes and Kidney Disease: A Systematic Review. *JAMA.* 2014;312(24):2668–75.
51. Wu L, Zhu J, Prokop L, Murad M. Pharmacologic Therapy of Diabetes and Overall Cancer Risk and Mortality: A Meta-Analysis of 265 Studies. *Sci Rep.* 2015;15(5):10147.
52. Zhao C, Wang W, Xu D, Li H, Li M, Wang F. Insulin and risk of diabetic retinopathy in patients with type 2 diabetes mellitus: data from a meta-analysis of seven cohort studies. *Diagn Pathol.* 2014;9(1):130.

53. Zhang J, Ma J, Zhou N, Zhang B, An J. Insulin Use and Risk of Diabetic Macular Edema in Diabetes Mellitus: A Systemic Review and Meta-Analysis of Observational Studies. *Med Sci Monit.* 2015;21:929–36.
54. Janghorbani M, Dehghani M, Salehi-Marzijarani M. Systematic review and meta-analysis of insulin therapy and risk of cancer. *Horm Cancer.* 2012;3(4):137–46.
55. Singh S, Singh PP, Singh AG, Murad MH, Sanchez W. Anti-diabetic medications and the risk of hepatocellular cancer: a systematic review and meta-analysis. *Am J Gastroenterol.* Nature Publishing Group; 2013;108(6):881–91; quiz 892.
56. Wang L, Cai S, Teng Z, Zhao X, Chen X, Bai X. Insulin therapy contributes to the increased risk of colorectal cancer in diabetes patients : a meta-analysis. 2013;2–5.
57. Bu W, Song L, Zhao D, Guo B, Liu J. Insulin therapy and the risk of colorectal cancer in patients with type 2 diabetes: a meta-analysis of observational studies. *Br J Clin Pharmacol.* 2014;78(2):301–9.
58. Singh S, Singh H, Singh PP, Murad MH, Limburg PJ. Antidiabetic medications and the risk of colorectal cancer in patients with diabetes mellitus: a systematic review and meta-analysis. *Cancer Epidemiol Biomarkers Prev.* 2013;22(12):2258–68.
59. Singh S, Singh PP, Singh AG, Murad MH, McWilliams RR, Chari ST. Anti-diabetic medications and risk of pancreatic cancer in patients with diabetes mellitus: a systematic review and meta-analysis. *Am J Gastroenterol.* Nature Publishing Group; 2013;108(4):510–9; quiz 520.
60. Gerstein HC, Bosch J, Dagenais GR, Díaz R, Jung H, Maggioni AP et al. Basal insulin and cardiovascular and other outcomes in dysglycemia. *N Engl J Med.* 2012;367(4):319–28.
61. Forst T, Hanefeld M, Jacob S, Moeser G, Schwenk G, Pfützner A et al. Association of sulphonylurea treatment with all-cause and cardiovascular mortality: a systematic review and meta-analysis of observational studies. *Diabetes Vasc Dis Res.* 2013;10(4):302–14.
62. Monami M, Genovese S, Mannucci E. Cardiovascular safety of sulfonylureas: a meta-analysis of randomized clinical trials. *Diabetes Obes Metab.* 2013;15(10):938–53.
63. Phung OJ, Schwartzman E, Allen RW, Engel SS, Rajpathak SN. Sulphonylureas and risk of cardiovascular disease: systematic review and meta-analysis. *Diabet Med.* 2013;30(10):1160–71.
64. Thakkar B, Aronis KN, Vamvini MT, Shields K, Mantzoros CS. Metformin and sulfonylureas in relation to cancer risk in type II diabetes patients: a meta-analysis using primary data of published studies. *Metabolism.* Elsevier B.V.; 2013;62(7):922–34.
65. Varas-lorenzo C, Margulis A V, Pladevall M, Riera-guardia N, Calingaert B, Hazell L et al. The risk of heart failure associated with the use of noninsulin blood glucose-lowering drugs : systematic review and meta-analysis of published observational studies. 2014;

66. Zhang F, Xiang H, Fan Y, Ganchuluun T-A, Kong W, Ouyang Q et al. The effects of sulfonylureas plus metformin on lipids, blood pressure, and adverse events in type 2 diabetes: a meta-analysis of randomized controlled trials. *Endocrine*. 2013;44(3):648–58.
67. The American Geriatrics Society. American Geriatrics Society Updated Beers Criteria for Potentially Inappropriate Medication Use in Older Adults. *J Am Geriatr Soc*. 2012;60(4):616–31.
68. O'Mahony D, O'Sullivan D, Byrne S, O'Connor MN, Ryan C, Gallagher P. STOPP/START criteria for potentially inappropriate prescribing in older people: version 2. *Age Ageing*. 2015;44(2):213–8.
69. Gangji AS, Cukierman T, Gerstein HC, Goldsmith CH, Clase CM. A systematic review and meta-analysis of hypoglycemia and cardiovascular events: a comparison of glyburide with other secretagogues and with insulin. *Diabetes Care*. 2007;30(2):389–94.
70. Chan S, Colagiuri S. Systematic review and meta-analysis of the efficacy and hypoglycemic safety of gliclazide versus other insulinotropic agents. *Diabetes Res Clin Pract*. 2015;110:75–81.
71. Loke Y, Singh S, Furberg C. Long-term use of thiazolidinediones and fractures in type 2 diabetes: a meta-analysis. *CMAJ*. 2009;180(1):32–9.
72. Zhu Z-N, Jiang Y-F, Ding T. Risk of fracture with thiazolidinediones: an updated meta-analysis of randomized clinical trials. *Bone*. Elsevier Inc.; 2014;68:115–23.
73. Hernandez A, Usmani A, Rajamanickam A, Moheet A. Thiazolidinediones and Risk of Heart Failure in Patients with or at High Risk of Type 2 Diabetes Mellitus. *Am J Cardiovasc Drugs*. 2011;11(2):115–28.
74. Loke YK, Kwok CS, Singh S. Comparative cardiovascular effects of thiazolidinediones : systematic review and meta-analysis of observational. 2011;
75. Berlie HD, Garwood CL. Diabetes medications related to an increased risk of falls and fall-related morbidity in the elderly. *Ann Pharmacother*. 2010;44(4):712–7.
76. Singh S, Loke YK, Furberg CD. Long-term use of thiazolidinediones and the associated risk of pneumonia or lower respiratory tract infection: systematic review and meta-analysis. *Thorax*. 2011;66(5):383–8.
77. Nissen SE, Wolski K. Rosiglitazone revisited: an updated meta-analysis of risk for myocardial infarction and cardiovascular mortality. *Arch Intern Med*. 2010;170(14):1191–201.
78. Colmers I, Bowker S, Majumdar S, Johnson J. Use of thiazolidinediones and the risk of bladder cancer among people with type 2 diabetes: a meta-analysis. *CMAJ*. 2012;184(12):E675–83.

79. Ferwana M, Firwana B, Hasan R, Al-Mallah MH, Kim S, Montori VM et al. Pioglitazone and risk of bladder cancer: a meta-analysis of controlled studies. *Diabet Med*. 2013;30(9):1026–32.
80. He S, Tang Y, Zhao G, Yang X, Wang D, Zhang Y. Pioglitazone prescription increases risk of bladder cancer in patients with type 2 diabetes: an updated meta-analysis. *Tumour Biol*. 2014;35(3):2095–102.
81. Turner RM, Kwok CS, Chen-Turner C, Maduakor C a, Singh S, Loke YK. Thiazolidinediones and associated risk of bladder cancer: a systematic review and meta-analysis. *Br J Clin Pharmacol*. 2014;78(2):258–73.
82. Bosetti C, Rosato V, Buniato D, Zambon A, La Vecchia C, Corrao G. Cancer risk for patients using thiazolidinediones for type 2 diabetes: a meta-analysis. *Oncologist*. 2013;18(2):148–56.
83. Monami M, Cremasco F, Lamanna C. Predictors of response to dipeptidyl peptidase-4 inhibitors : evidence from randomized clinical trials. 2011;(January):362–72.
84. Clar C, Royle P, Waugh N. Adding pioglitazone to insulin containing regimens in type 2 diabetes: systematic review and meta-analysis. *PLoS One*. 2009;4(7):e6112.
85. Pladevall M, Riera-Guardia N, Margulis A V, Varas-Lorenzo C, Calingaert B, Perez-Gutthann S. Cardiovascular risk associated with the use of glitazones, metformin and sulfonylureas: meta-analysis of published observational studies. *BMC Cardiovasc Disord*. 2016;16:14.
86. Yin J, Deng H, Qin S, Tang W, Zeng L, Zhou B. Comparison of repaglinide and metformin versus metformin alone for type 2 diabetes : a meta-analysis of randomized controlled trials. *Diabetes Res Clin Pract*. Elsevier Ireland Ltd; 2014;105(3):e10–5.
87. Bolen S, Feldman L, Vassy J, Wilson L, Yeh H. Comparative Effectiveness and Safety of Oral Medications for Type 2 Diabetes Mellitus. *Ann Fam Med*. 2007;147:386–99.
88. Mogensen UM, Andersson C, Fosbøl EL, Schramm TK, Vaag A, Scheller NM et al. Metformin in combination with various insulin secretagogues in type 2 diabetes and associated risk of cardiovascular morbidity and mortality--a retrospective nationwide study. *Diabetes Res Clin Pract*. Elsevier Ireland Ltd; 2015;107(1):104–12.
89. Van de Laar F, Lucassen P, Akkermans R, van de Lisdonk E, Rutten G, van Weel C. Alpha-Glucosidase Inhibitors for Patients with Type 2 Diabetes: Results from a Cochrane systematic review and meta-analysis. *Diabetes Care*. 2005;28(1):166–75.
90. Monami M, Dicembrini I, Mannucci E. Dipeptidyl peptidase-4 inhibitors and heart failure: a meta-analysis of randomized clinical trials. *Nutr Metab Cardiovasc Dis*. Elsevier Ltd; 2014;24(7):689–97.
91. Savarese G, Perrone-Filardi P, D'Amore C, Vitale C, Trimarco B, Pani L et al. Cardiovascular effects of dipeptidyl peptidase-4 inhibitors in diabetic patients: A meta-analysis. *Int J Cardiol*. 2015;181:239–44.

92. Foroutan N, Muratov S, Levine M. Safety and efficacy of dipeptidyl peptidase-4 inhibitors vs sulfonylurea in metformin-based combination therapy for type 2 diabetes mellitus: Systematic review and meta-analysis. *Clin Invest Med*. 2016;39(2):E48–62.
93. Mishriky BM, Cummings DM, Tanenberg RJ. The efficacy and safety of DPP4 inhibitors compared to sulfonylureas as add-on therapy to metformin in patients with Type 2 diabetes: A systematic review and meta-analysis. *Diabetes Res Clin Pract*. Elsevier Ireland Ltd; 2015;109(2):378–88.
94. Kawalec P, Mikrut A, Lopuch S. The safety of dipeptidyl peptidase-4 (DPP-4) inhibitors or sodium-glucose cotransporter 2 (SGLT-2) inhibitors added to metformin background therapy in patients with type 2 diabetes mellitus: a systematic review and meta-analysis. *Diabetes Metab Res Rev*. 2014;30(269-83).
95. Roshanov P, Dennis B. Incretin-based therapies are associated with acute pancreatitis: Meta-analysis of large randomized controlled trials. *Diabetes Res Clin Pract*. 2015;110:e13–7.
96. Wang T, Wang F, Gou Z, Tang H, Li C, Shi L et al. Using real-world data to evaluate the association of incretin-based therapies with risk of acute pancreatitis: a meta-analysis of 1 324 515 patients from observational studies. *Diabetes Obes Metab*. 2015;17:32–41.
97. Rosenstock J, Marx N, Neubacher D, Seck T, Patel S, Woerle H-J et al. Cardiovascular safety of linagliptin in type 2 diabetes: a comprehensive patient-level pooled analysis of prospectively adjudicated cardiovascular events. *Cardiovasc Diabetol*. 2015;14:57.
98. Agarwal S, Parashar A, Menon V. Meta-analysis of the cardiovascular outcomes with dipeptidyl peptidase 4 inhibitors: validation of the current FDA mandate. *Am J Cardiovasc Drugs*. 2014;14(3):191–207.
99. Alves C, Batel-Marques F, Macedo AF. A meta-analysis of serious adverse events reported with exenatide and liraglutide: acute pancreatitis and cancer. *Diabetes Res Clin Pract*. Elsevier Ireland Ltd; 2012;98(2):271–84.
100. Monami M, Dicembrini I, Nardini C, Fiordelli I, Mannucci E. Glucagon-like peptide-1 receptor agonists and pancreatitis: a meta-analysis of randomized clinical trials. *Diabetes Res Clin Pract*. Elsevier Ireland Ltd; 2014;103(2):269–75.
101. Li L, Shen J, Bala MM, Olav P, Rios LP, Malaga G et al. Incretin treatment and risk of pancreatitis in patients with type 2 diabetes mellitus : systematic review and meta-analysis of randomised and non-randomised. 2014;2366(April):1–19.
102. Jensen T, Saha K, Steinberg W. Is There a Link Between Liraglutide and Pancreatitis? A Post Hoc Review of Pooled and Patient-Level Data From Completed Liraglutide Type 2 Diabetes Clinical Trials. *Diabetes Care*. 2015;38(6):1058–66.
103. Sun F, Yu K, Yang Z, Wu S, Zhang Y, Shi L et al. Impact of GLP-1 receptor agonists on major gastrointestinal disorders for type 2 diabetes mellitus: a mixed treatment comparison meta-analysis. *Exp Diabetes Res*. 2012;2012:230624.

104. Mabileau G, Mieczkowska A, Chappard D. Use of glucagon-like peptide-1 receptor agonists and bone fractures: a meta-analysis of randomized clinical trials. *J Diabetes*. 2014;6(3):260–6.
105. Su B, Sheng H, Zhang M, Bu L, Yang P, Li L et al. Risk of bone fractures associated with glucagon-like peptide-1 receptor agonists' treatment: a meta-analysis of randomized controlled trials. *Endocrine*. 2015;48(1):107–15.
106. Nikfar S, Abdollahi M, Salari P. The Efficacy and Tolerability of Exenatide in Comparison to Placebo ; A Systematic Review and Meta-Analysis of Randomized Clinical Trials. *J Pharm Pharm Sci*. 2012;15(1):1–30.
107. Liu F, Dong J, Yang Q, Xue X, Ren Z, Gan Y et al. Glucagon-like peptide 1 receptor agonist is more efficacious than insulin glargine for poorly controlled type 2 diabetes: A systematic review and meta-analysis. *J Diabetes*. 2015;7(3):322–8.
108. Zhang L, Zhang M, Zhang Y, Tong N. Efficacy and safety of dulaglutide in patients with type 2 diabetes: a meta-analysis and systematic review. *Sci Rep*. 2016;6:18904.
109. Wu J, Foote C, Blomster J, Toyama T, Perkovic V, Sudnstrom J et al. Effects of sodium-glucose cotransporter-2 inhibitors on cardiovascular events, death, and major safety outcomes in adults with type 2 diabetes: a systematic review and meta-analysis. *Lancet Diabetes Endocrinol*. 2016;4(5):411–9.
110. Zhong X, Lai D, Ye Y, Tang Z, Yu B, Huang Y. Efficacy and safety of empagliflozin as add-on to metformin for type 2 diabetes: a systematic review and meta-analysis. *Eur J Clin Pharmacol*. 2016;72:655–63.
111. Monami M, Nardini C, Mannucci E. Efficacy and safety of sodium glucose co-transport-2 inhibitors in type 2 diabetes: a meta-analysis of randomized clinical trials. *Diabetes, Obes Metab*. 2014;16:457–66.
112. Yang X-P, Lai D, Zhong K-Y, Shen H-P, Huang Y-L. Efficacy and safety of canagliflozin in subjects with type 2 diabetes: systematic review and meta-analysis. *Eur J Clin Pharmacol*. 2014;70(10):1149–58.
113. Vasilakou D, Karagiannis T, Athanasiadou E, Mainou M, Liakos A. Sodium-glucose cotransporter 2 inhibitors for Type 2 Diabetes: A systematic review and meta-analysis. *Ann Intern Med*. 2015;159:262–74.
114. Kaur K, Likar N, Dang A. Efficacy and safety of canagliflozin among patients with type 2 diabetes mellitus: A systematic review and meta-analysis. *Indian J Endocr Metab*. 2015;19:705–21.
115. Liakos A, Karagiannis T, Athanasiadou E, Sarigianni M, Mainou M, Papatheodorou K et al. Efficacy and safety of empagliflozin for type 2 diabetes: a systematic review and meta-analysis. *Diabetes Obes Metab*. 2014;16(9):84–93.
116. Clar C, Gill J, Court R, Waugh N. Systematic review of SGLT2 receptor inhibitors in dual or triple therapy in type 2 diabetes. *BMJ Open*. 2012;2:e001007.



117. Musso G, Gambino R, Cassader M, Pagano G. A novel approach to control hyperglycemia in type 2 diabetes: Sodium glucose co-transport (SGLT) inhibitors. Systematic review and meta-analysis of randomized trials. *Ann Med*. 2011;Early Onli:1–19.
118. Taylor S, Blau J, Rother K. SGLT2 Inhibitors May Predispose to Ketoacidosis. *J Clin Endocrinol Metab*. 2015;100(8):2849–52.
119. Williams S a, Pollack MF, Dibonaventura M. Effects of hypoglycemia on health-related quality of life, treatment satisfaction and healthcare resource utilization in patients with type 2 diabetes mellitus. *Diabetes Res Clin Pract*. Elsevier Ireland Ltd; 2011;91(3):363–70.
120. Sheu WH-H, Ji L-N, Nitiyanant W, Baik SH, Yin D, Mavros P et al. Hypoglycemia is associated with increased worry and lower quality of life among patients with type 2 diabetes treated with oral antihyperglycemic agents in the Asia-Pacific region. *Diabetes Res Clin Pract*. 2012;96(2):141–8.
121. Alvarez-guisasola F, Yin DD, Nocea G, Qiu Y, Mavros P. Association of hypoglycemic symptoms with patients ' rating of their health-related quality of life state : a cross sectional study. 2010;1–8.
122. Marrett E, Radican L, Davies MJ, Zhang Q. Assessment of severity and frequency of self-reported hypoglycemia on quality of life in patients with type 2 diabetes treated with oral antihyperglycemic agents: A survey study. *BMC Res Notes*. 2011;4:251.
123. Vexiau P, Mavros P, Krishnarajah G, Lyu R, Yin D. Hypoglycaemia in patients with type 2 diabetes treated with a combination of metformin and sulphonylurea therapy in France. *Diabetes Obes Metab*. 2008;10 Suppl 1:16–24.
124. Nicolucci A, Pintaudi B, Rossi MC, Messina R, Dotta F, Frontoni S et al. The social burden of hypoglycemia in the elderly. *Acta Diabetol*. Springer Milan; 2015;52(4):677–85.
125. Leppin A, Montori V, Gionfriddo M. Minimally Disruptive Medicine: A Pragmatically Comprehensive Model for Delivering Care to Patients with Multiple Chronic Conditions. *Healthcare*. 2015;3(1):50–63.
126. Cayea D, Boyd C, Durso SC. Individualising Therapy for Older Adults with Diabetes Mellitus. 2007;24(10):851–63.
127. Vijan S, Hayward R a, Ronis DL, Hofer TP. Brief report: the burden of diabetes therapy: implications for the design of effective patient-centered treatment regimens. *J Gen Intern Med*. 2005;20(5):479–82.
128. Huang E, Brown S, Ewigman B, Foley E, Meltzer DO. Patient Perceptions of Quality of Life With Diabetes-Related Complications and. *Diabetes Care*. 2007;30(10):2478–83.
129. Huang E, Gorawara-Bhat R, Chin M. Self-reported goals of older patietns with Type 2 Diabetes Mellitus. *J Am Geriatr Soc*. 2005;53(2):306–11.

130. Pitale S, Kernan-Schroeder D, Emanuele N, Sawin C, Sacks J, Abaira C. Health-related quality of life in the VA Feasibility Study on glycemic control and complications in type 2 diabetes mellitus. *J Diabetes Complications*. 2005;19(4):207–11.
131. Feil D, Rajan M, Soroka O, Tseng C, Miller D, Pogach L. Risk of hypoglycemia in older veterans with dementia and cognitive impairment: implications for practice and policy. *J Am Geriatr Soc*. 2011;59(12):2263–72.
132. Chin M, Drum M, Jin L, Shook M, Huang ES, Meltzer DO. Variation in treatment preferences and care goals among older diabetes patients and their physicians. *Med Care*. 2008;46(3):275–86.
133. Public Health Agency of Canada. Diabetes in Canada - facts and figures from a public health perspective. Ottawa; 2011.
134. Canadian Diabetes Association. An economic tsunami: The cost of diabetes in Canada. 2009.
135. Ozieh M, Bishu K, Dismuke C, Egede L. Trends in healthcare expenditure in United States adults with diabetes: 2002-2011. *Diabetes Care*. 2015;38(10):1844051.
136. Bron M, Marynchenko M, Yang H, Yu AP, Wu EQ. Hypoglycemia, treatment discontinuation, and costs in patients with type 2 diabetes mellitus on oral antidiabetic drugs. *Postgrad Med*. 2012;124(1):124–32.
137. Boulin M, Diaby V, Tannenbaum C. Preventing Unnecessary Costs of Drug-Induced Hypoglycemia in Older Adults with Type 2 Diabetes in the United States and Canada. *PLoS One*. 2016;11(9):e0162951.

### Appendix 3. Summary of findings tables for systematic review

#### Deprescribing of glyburide compared to usual care for Type 2 Diabetes

##### Deprescribing of glyburide compared to usual care for Type 2 Diabetes

**Patient or population:** Type 2 Diabetes, >65 y.o.

**Settings:** Community dwelling

**Intervention:** Deprescribing of Glyburide

**Comparison:** Control

| Outcomes                                                                                                  | Illustrative comparative risks* (95% CI) |                                                                                                     | Relative effect (95% CI)      | No of Participants (studies) | Quality of the evidence (GRADE)          | Comments |
|-----------------------------------------------------------------------------------------------------------|------------------------------------------|-----------------------------------------------------------------------------------------------------|-------------------------------|------------------------------|------------------------------------------|----------|
|                                                                                                           | Assumed risk                             | Corresponding risk                                                                                  |                               |                              |                                          |          |
|                                                                                                           | Control                                  | Deprescribing of Glyburide                                                                          |                               |                              |                                          |          |
| <b>Change in A1C</b><br>Follow-up: 3-9 months                                                             | Continuation of glyburide                | The mean change in A1C in the intervention groups was <b>0.02 lower</b> (0.16 lower to 0.12 higher) |                               | 3369 (1 study)               | ⊕⊕⊕⊕<br><b>very low</b> <sup>1,2,3</sup> |          |
| <b>Hypoglycemia</b><br>ICD-9 Codes in health administrative databases and EMR<br>Follow-up: mean 9 months | <b>26 per 1000</b> <sup>4</sup>          | <b>28 per 1000</b> (20 to 39)                                                                       | <b>RR 1.08</b> (0.78 to 1.5)  | 6254 (1 study)               | ⊕⊕⊕⊕<br><b>very low</b> <sup>1,5,6</sup> |          |
| <b>Discontinuation rate</b><br>No new prescription for glyburide<br>Follow-up: mean 135 days              | <b>560 per 1000</b> <sup>4</sup>         | <b>717 per 1000</b> (684 to 745)                                                                    | <b>RR 1.28</b> (1.22 to 1.33) | 6254 (1 study)               | ⊕⊕⊕⊕<br><b>very low</b> <sup>1</sup>     |          |

\*The basis for the **assumed risk** (e.g. the median control group risk across studies) is provided in footnotes. The **corresponding risk** (and its 95% confidence interval) is based on the assumed risk in the comparison group and the **relative effect** of the intervention (and its 95% CI).

**CI:** Confidence interval; **RR:** Risk ratio;

GRADE Working Group grades of evidence

**High quality:** Further research is very unlikely to change our confidence in the estimate of effect.

**Moderate quality:** Further research is likely to have an important impact on our confidence in the estimate of effect and may change the estimate.

**Low quality:** Further research is very likely to have an important impact on our confidence in the estimate of effect and is likely to change the estimate.

**Very quality:** We are very uncertain about the estimate.

<sup>1</sup> Serious risk of bias due to contamination of intervention in control group

<sup>2</sup> 95% CI narrow

<sup>3</sup> Mean difference very small at 0.02%

<sup>4</sup> Usual care

<sup>5</sup> 95% CI around the estimate of effect includes both no effect and appreciable harm

<sup>6</sup> Total number of events <300

## Deprescribing versus continuation of antihyperglycemics for type 2 diabetes in the frail elderly

### Deprescribing versus continuation of antihyperglycemics for type 2 diabetes in the frail elderly

**Patient or population:** type 2 diabetes, frail elderly

**Settings:** Nursing homes in Sweden

**Intervention:** Deprescribing of antihyperglycemics

**Comparison:** Continuation of antihyperglycemics

| Outcomes                                           | Illustrative comparative risks* (95% CI) |                                                                                                      | Relative effect (95% CI)         | No of Participants (studies) | Quality of the evidence (GRADE)        | Comments |
|----------------------------------------------------|------------------------------------------|------------------------------------------------------------------------------------------------------|----------------------------------|------------------------------|----------------------------------------|----------|
|                                                    | Assumed risk                             | Corresponding risk                                                                                   |                                  |                              |                                        |          |
|                                                    | Continuation of antihyperglycemics       | Deprescribing of antihyperglycemics                                                                  |                                  |                              |                                        |          |
| <b>Change in A1C</b><br>Follow-up: median 6 months |                                          | The mean change in A1C in the intervention groups was<br><b>1.1% higher</b><br>(0.56 to 1.64 higher) |                                  | 79<br>(1 study)              | ⊕⊕⊕⊕<br><b>very low</b> <sup>1,2</sup> |          |
| <b>All-cause mortality</b>                         | <b>212 per 1000</b>                      | <b>157 per 1000</b><br>(62 to 397)                                                                   | <b>RR 0.74</b><br>(0.29 to 1.87) | 98<br>(1 study)              | ⊕⊕⊕⊕<br><b>very low</b> <sup>1,3</sup> |          |

\*The basis for the **assumed risk** (e.g. the median control group risk across studies) is provided in footnotes. The **corresponding risk** (and its 95% confidence interval) is based on the assumed risk in the comparison group and the **relative effect** of the intervention (and its 95% CI).

**CI:** Confidence interval; **RR:** Risk ratio;

GRADE Working Group grades of evidence

**High quality:** Further research is very unlikely to change our confidence in the estimate of effect.

**Moderate quality:** Further research is likely to have an important impact on our confidence in the estimate of effect and may change the estimate.

**Low quality:** Further research is very likely to have an important impact on our confidence in the estimate of effect and is likely to change the estimate.

**Very low quality:** We are very uncertain about the estimate.

<sup>1</sup> Very serious risk of bias due to selection bias and potential confounding

<sup>2</sup> 95% CI wide, <400 participants

<sup>3</sup> 95% CI wide, number of events <300

### References

Aspinall SL, Zhao X, Good CB, Stone R a, Boresi J, Cox S, et al. Intervention to decrease glyburide use in elderly patients with renal insufficiency. Am J Geriatr Pharmacother. 2011;9(1):58–68.

Sjöblom P, Tengblad A, Löfgren U-B, Lannering C, Anderberg N, Rosenqvist U, et al. Can diabetes medication be reduced in elderly patients? An observational study of diabetes drug withdrawal in nursing home patients with tight glycaemic control. Diabetes Res Clin Pract. 2008;82(2):197–202.

#### Appendix 4. Ranges of frequency ratios of harms

| Harm                                                         | Frequency ratio             | Confidence interval               | Statistically Significant | Reference        | Study design                                                                                              |
|--------------------------------------------------------------|-----------------------------|-----------------------------------|---------------------------|------------------|-----------------------------------------------------------------------------------------------------------|
| Biguanides (Metformin)                                       |                             |                                   |                           |                  |                                                                                                           |
| Cancer Incidence                                             | RR: 0.86                    | (0.83-0.90)                       | Yes                       | Wu L (2015)      | MA of 21 cohort, 22 case-control studies and 23 RCTs                                                      |
| Cancer Mortality                                             | RR 0.70                     | (0.53-0.94)                       | Yes                       | Wu L (2015)      | MA of 6 cohort, 6 RCTs                                                                                    |
| Lactic acidosis                                              | WMD: 0.04 mmol/L            | (0.00 to 0.13)                    | No                        | Salpeter (2010)  | MA of 209 prospective comparative trials, 125 prospective cohort studies, 13 retrospective cohort studies |
| Lactic acidosis in individuals with impaired kidney function | NA                          | 3 and 10 per 100,000 person-years | No                        | Inzucchi (2014)  | SR of 10 metabolic investigations, 20 case series, 31 observational studies, 3 MA, 1 clinical trial       |
| Vitamin B12 deficiency                                       | MD: -53.93                  | (-81.44 to -26.42)                | Yes                       | Liu (2014)       | SR of 6 RCTs                                                                                              |
| Insulin                                                      |                             |                                   |                           |                  |                                                                                                           |
| Breast cancer                                                | HR: 1.04 (insulin glargine) | (0.91-1.17)                       | No                        | Bronsveld (2015) | MA of 13 epidemiological studies                                                                          |
| Colorectal cancer*                                           | RR: 1.69                    | (1.25-2.27)                       | Yes                       | Bu (2014)        | MA of 7 case-control, 5 cohort studies                                                                    |

|                          |                            |             |     |                    |                                           |
|--------------------------|----------------------------|-------------|-----|--------------------|-------------------------------------------|
|                          | OR: 1.33                   | (0.91-1.94) | No  | Singh (2013)       | MA of 5 case-control, 4 cohort studies    |
|                          | RR: 1.61                   | (1.18-1.35) | Yes | Wang (2013)        | MA of 1 case-control, 3 cohort studies    |
|                          | RR: 1.50                   | (1.08-2.08) | Yes | Janghorbani (2012) | MA of 5 case-control, 10 cohort studies   |
| Cancer-related mortality | RR 1.19                    | (0.80-1.77) | No  | Wu (2015)          | MA of 10 cohort, 2 RCTs                   |
| Hepatocellular cancer*   | OR: 2.61                   | (1.46-4.65) | Yes | Singh (2013)       | MA of 5 case-control, 2 cohort studies    |
| Overall cancer*          | RR: 1.21                   | (1.08-1.36) | Yes | Wu L (2015)        | MA of 26 cohort, 34 case-control, 13 RCTs |
|                          | RR: 1.39                   | (1.14-1.70) | Yes | Janghorbani (2012) | MA of 10 cohort, 5 case-control studies   |
| Pancreatic cancer*       | OR: 1.59                   | 0.85-2.96   | No  | Singh (2013)       | MA of 5 cohort, 2 case-control studies    |
|                          | RR: 4.78                   | (3.12-7.32) | Yes | Janghorbani (2012) | MA of 5 case control, 10 cohort studies   |
| Diabetic retinopathy     | RR: 2.30                   | (1.35-3.93) | Yes | Zhao (2014)        | MA of 7 cohort studies                    |
| Heart failure            | RR: 0.9 (insulin glargine) | (0.77-1.05) | No  | Udell (2015)       | MA of 14 RCTs                             |

|                          |                         |             |     |                |                                                 |
|--------------------------|-------------------------|-------------|-----|----------------|-------------------------------------------------|
| Macular edema            | RR: 3.42                | (2.42-4.83) | Yes | Zhang (2016)   | MA of 3 case-control, 11 cohort studies         |
| Sulfonylureas (SU)       |                         |             |     |                |                                                 |
| All cancer               | RR: 1.20                | (1.13-1.27) | Yes | Wu (2015)      | MA of 18 case-control, 16 cohort, 38 RCTs       |
|                          | RR: 1.55 (cohort)       | (1.48-1.63) | Yes | Thakkar (2013) | MA of 2 RCTs, 6 cohort, 10 case-control studies |
|                          | RR: 1.17 (RCTs)         | (0.95-1.45) | No  | Thakkar (2013) | MA of 2 RCTs, 6 cohort, 10 case-control studies |
|                          | RR: 1.02 (case control) | (0.93-1.13) | No  | Thakkar (2013) | MA of 2 RCTs, 6 cohort, 10 case-control studies |
| Cancer-related mortality | RR (1.20)               | (1.13-1.27) | Yes | Wu (2015)      | MA of 18 case-control, 16 cohort, 38 RCTs       |
| All-cause mortality      | OR: 1.92                | (1.48-2.49) | Yes | Forst (2013)   | SR/MA of 17 cohort, 3 case-control studies      |
|                          | OR: 1.22                | (1.01-1.49) | Yes | Monami (2013)  | MA of 115 RCTs                                  |
| Colorectal cancer        | OR: OR: 1.11            | (0.97-1.26) | No  | Singh (2013)   | MA of 3 case-control, 4 cohort studies          |
| CV mortality             | OR: 2.72                | (1.95-3.79) | Yes | Forst (2013)   | MA of 17 cohort, 3 case-control studies         |

|                                    |                                                                  |             |     |                      |                                                     |
|------------------------------------|------------------------------------------------------------------|-------------|-----|----------------------|-----------------------------------------------------|
|                                    | RR: 1.27                                                         | (1.18-1.34) | No  | Phung (2013)         | SR/MA of 12 RCTs, 17 cohort, 4 case-control studies |
| Hypoglycemia                       | RR: 0.85 (gliclazide vs. other SUs, DPP-IV inhibitors, glinides) | (0.66-1.09) | No  | Chan (2015)          | MA of 7 RCTs                                        |
|                                    | RR: 0.47 (gliclazide vs. other SU)                               | (0.27-0.79) | Yes | Chan (2015)          | MA of 3 RCTs                                        |
|                                    | RR: 4.09 (SU + metformin compared to metformin alone)            | (2.13-7.89) | Yes | Zhang (2013)         | MA of 20 RCTs                                       |
| Heart failure                      | RR: 1.17 (vs. metformin)                                         | (1.06-1.29) | Yes | Varas-Lorenzo (2014) | MA of 5 cohort studies                              |
| Hepatocellular cancer              | OR: 1.62                                                         | (1.16-2.24) | Yes | Singh (2013)         | MA of 4 case-control, 4 cohort studies              |
| Major cardiovascular events (MACE) | RR: 1.10                                                         | (1.04-1.16) | No  | Phung (2013)         | MA of 12 RCTs, 17 cohort, 4 case-control studies    |
|                                    | OR: 1.08                                                         | (0.86-1.36) | No  | Monami (2013)        | MA of 115 RCTs                                      |
| Myocardial infarction              | RR: 1.24 (vs. metformin)                                         | (1.14-1.34) | Yes | Pladevall (2016)     | MA of 1 case-control, 16 cohort studies             |
|                                    | OR: 0.88                                                         | (0.75-1.04) | No  | Monami (2013)        | MA of 115 RCTs                                      |



|                                                                     |                          |             |     |                |                                                                   |
|---------------------------------------------------------------------|--------------------------|-------------|-----|----------------|-------------------------------------------------------------------|
| Nervous system reactions (dizziness, anxiety, insomnia and vertigo) | RR: 1.27                 | (1.03-1.57) | No  | Zhang (2013)   | MA of 20 RCTs                                                     |
| Pancreatic cancer                                                   | OR: 1.70                 | (1.27-2.28) | Yes | Singh (2013)   | MA of 5 cohort, 3 case-control studies                            |
| Stroke                                                              | RR: 1.09                 | (0.90-1.32) | No  | Phung (2013)   | MA of 12 RCTs, 17 cohort, 4 case-control studies                  |
|                                                                     | OR: 1.28                 | (1.03-1.60) | Yes | Monami (2013)  | MA of 115 RCTs                                                    |
| Thiazolidinediones (TZDs)                                           |                          |             |     |                |                                                                   |
| Cancer Incidence                                                    | RR: 0.93                 | (0.91-0.96) | Yes | Wu (2015)      | MA of 12 cohort, 15 case-control studies                          |
| Cancer-related mortality                                            | RR 1.40                  | (0.57-3.40) | No  | Wu (2015)      | MA of 16 studies                                                  |
| Bladder cancer                                                      | RR: 1.20 (pioglitazone)  | (1.07-1.34) | No  | Bosetti (2013) | MA of 3 case-control, 14 cohort studies                           |
|                                                                     | RR: 1.08 (rosiglitazone) | (0.95-1.23) | No  | Bosetti (2013) | MA of 3 case-control, 14 cohort studies                           |
|                                                                     | HR: 1.23 (pioglitazone)  | (1.09-1.39) | Yes | Ferwana (2013) | MA of 1 RCT, 4 cohort, 1 nested case-control study                |
|                                                                     | HR: 1.21 (pioglitazone)  | (1.07-1.36) | Yes | He (2013)      | MA of 5 cohort, 3 case control, 1 RCT and one case/non-case study |

|       |                                                                   |             |     |                     |                                                                                |
|-------|-------------------------------------------------------------------|-------------|-----|---------------------|--------------------------------------------------------------------------------|
|       | OR: 2.51<br>(pioglitazone;<br>from RCTs)                          | (1.09-5.80) | Yes | Turner<br>(2013)    | MA of 5 RCTs,<br>8 cohort, 4<br>case-control,<br>and 1 case/non-<br>case study |
|       | OR: 1.21<br>(pioglitazone;<br>from<br>Observational<br>studies)   | (1.09-1.35) | Yes | Turner<br>(2013)    | MA of 5 RCTs,<br>8 cohort, 4<br>case-control,<br>and 1 case/non-<br>case study |
|       | OR: 0.84<br>(rosiglitazone<br>; from RCTs)                        | (0.35-2.04) | No  | Turner<br>(2013)    | MA of 5 RCTs,<br>8 cohort, 4<br>case-control,<br>and 1 case/non-<br>case study |
|       | OR: 1.03<br>(rosiglitazone<br>; from<br>observational<br>studies) | (0.94-1.12) | No  | Turner<br>(2013)    | MA of 5 RCTs,<br>8 cohort, 4<br>case-control,<br>and 1 case/non-<br>case study |
|       | OR: 1.25<br>(pioglitazone<br>vs.<br>rosiglitazone)                | (0.91-1.72) | No  | Turner<br>(2013)    | MA of 5 RCTs,<br>8 cohort, 4<br>case-control,<br>and 1 case/non-<br>case study |
|       | RR: 1.22<br>(pioglitazone<br>– cohort)                            | (1.07-1.39) | Yes | Colmers<br>(2012)   | MA of 4 RCTs,<br>5 cohort, and 1<br>case-control                               |
|       | RR: 2.36<br>(pioglitazone<br>– 1 RCT)                             | (0.91-6.13) | No  | Colmers<br>(2012)   | MA of 4 RCTs,<br>5 cohort, and 1<br>case-control                               |
|       | RR: 1.15<br>(TZDs –<br>cohort)                                    | (1.04-1.26) | Yes | Colmers<br>(2012)   | MA of 4 RCTs,<br>5 cohort, and 1<br>case-control                               |
|       | RR: 0.87<br>(rosiglitazone<br>RCTs)                               | (0.34-2.23) | No  | Colmers<br>(2012)   | MA of 4 RCTs,<br>5 cohort, 1<br>case-control                                   |
| Edema | OR: 2.04                                                          | (1.85-2.26) | Yes | Hernandez<br>(2011) | MA of 29 RCTs                                                                  |

|               |                                                     |                                           |                  |                             |                                       |
|---------------|-----------------------------------------------------|-------------------------------------------|------------------|-----------------------------|---------------------------------------|
|               | OR: 2.26<br>(TZDs)                                  | (2.02-2.53)                               | Yes              | Berlie<br>(2007)            | MA of 26 RCTs                         |
|               | OR: 2.42<br>(pioglitazone<br>)                      | (1.90-3.08)                               | Yes              | Berlie<br>(2007)            | MA of 26 RCTs                         |
|               | OR: 3.75<br>(rosiglitazone<br>)                     | (2.70-5.20)                               | Yes              | Berlie<br>(2007)            | MA of 26 RCTs                         |
| Fractures     | OR: 1.94<br>(women)<br>OR: 1.02<br>(men)            | (1.60-2.35)<br>(0.83-1.27)                | Yes<br>No        | Zhu<br>(2014)               | MA of 22 RCTs                         |
|               | OR: 1.45<br>OR: 2.23<br>(women)<br>OR: 1.0<br>(men) | (1.18-1.79)<br>(1.65-3.01)<br>(0.73-1.39) | Yes<br>Yes<br>No | Loke<br>(2009)              | MA of 10<br>RCTs, 2 cohort<br>studies |
| Heart failure | RR : 1.42                                           | (1.15-1.76)                               | Yes              | Udell<br>(2015)             | MA of 14 RCTs                         |
|               | RR: 1.16<br>(rosiglitazone<br>vs.<br>pioglitazone)  | (1.05-1.28)                               | Yes              | Varas-<br>Lorenzo<br>(2014) | MA of 5 cohort<br>studies             |
|               | RR: 1.36<br>(rosiglitazone<br>vs.<br>metformin)     | (1.17-1.59)                               | Yes              | Varas-<br>Lorenzo<br>(2014) | MA of 5 cohort<br>studies             |
|               | OR: 1.59<br>(TZDs)                                  | (1.34-1.89)                               | Yes              | Hernande<br>z (2011)        | MA of 29 RCTs                         |
|               | OR: 2.73<br>(rosiglitazone<br>)                     | (1.46-5.10)                               | No               | Hernande<br>z (2011)        | MA of 29 RCTs                         |

|                                                      |                                                      |             |     |                  |                                                       |
|------------------------------------------------------|------------------------------------------------------|-------------|-----|------------------|-------------------------------------------------------|
|                                                      | OR: 1.51<br>(pioglitazone)                           | (1.26-1.81) | No  | Hernandez (2011) | MA of 29 RCTs                                         |
|                                                      | OR: 1.22<br>(rosiglitazone compared to pioglitazone) | (1.14-1.31) | Yes | Loke (2011)      | MA of 4 case-control, 12 retrospective cohort studies |
| Hypoglycemia (when used in combination with insulin) | RR: 1.27                                             | (0.99-1.63) | No  | Clar (2009)      | MA of 8 RCTs                                          |
| Mortality                                            | OR: 1.14                                             | (1.09-1.20) | Yes | Loke (2011)      | MA of 4 case-control, 12 retrospective cohort studies |
|                                                      | OR: 1.03<br>(CV mortality)                           | (0.78-1.36) | No  | Nissen (2010)    | MA of 56 RCTs                                         |
| Myocardial infarction                                | RR: 1.13<br>(rosiglitazone vs. pioglitazone)         | (1.04-1.24) | Yes | Pladevall (2016) | MA of 1 case-control, 16 cohort studies               |
|                                                      | RR: 1.42<br>(rosiglitazone vs. metformin)            | (1.03-1.98) | Yes | Pladevall (2016) | MA of 1 case-control, 16 cohort studies               |
|                                                      | RR: 1.02<br>(pioglitazone vs. metformin)             | (0.75-1.38) | No  | Pladevall (2016) | MA of 1 case-control, 16 cohort studies               |
|                                                      | RR: 0.99<br>(rosiglitazone vs. SUs)                  | (0.78-1.25) | No  | Pladevall (2016) | MA of 1 case-control, 16 cohort studies               |
|                                                      | OR: 1.16<br>(rosiglitazone)                          | (1.07-1.24) | Yes | Loke (2011)      | MA of 4 case-control, 12 retrospective cohort studies |

|                            |                                                      |                            |            |                  |                                        |
|----------------------------|------------------------------------------------------|----------------------------|------------|------------------|----------------------------------------|
|                            | OR: 1.28                                             | (1.02-1.63)                | Yes        | Nissen (2010)    | MA of 56 RCTs                          |
| Pancreatitis               | OR: 0.786                                            | (0.357-1.734)              | No         | Monami (2011)    | MA of 53 RCTs                          |
| Pneumonia or LRTI          | RR: 1.40 (any)<br>RR: 1.39 (serious)                 | (1.08-1.82)<br>(1.05-1.83) | Yes<br>Yes | Singh (2011)     | MA of 13 RCTs                          |
| Reduced BMD (lumbar spine) | MD: -1.11%                                           | (-2.08 to -0.14)           | Yes        | Loke (2009)      | MA of 10 RCTs, 2 cohort studies        |
| Reduced BMD (hip)          | MD: -1.24%                                           | (-2.34 to -0.67)           | Yes        | Loke (2009)      | MA of 10 RCTs, 2 cohort studies        |
| Stroke                     | RR: 1.18 (rosiglitazone vs. pioglitazone)            | (1.02-1.36)                | Yes        | Pladevall (2016) | MA of 3 cohort studies                 |
| Meglitinides               |                                                      |                            |            |                  |                                        |
| Cancer incidence           | RR: 1.06                                             | (0.83-1.37)                | No         | Wu (2015)        | MA of 3 case-control, 3 cohort, 2 RCTs |
| CV mortality               | RR: 0.81 (compared to other insulin secretagogues)   | (0.56-1.19)                | N/A        | Mogensen (2014)  | Retrospective study                    |
| Hypoglycemia               | RR: 1.24 (Repaglinide +metformin vs metformin alone) | (0.72-2.04)                | No         | Yin (2014)       | MA                                     |
|                            | wARD: 0.02 (SU vs repaglinide)                       | (-0.02-0.05)               | N/A        | Bolen (2007)     | SR of 5 studies                        |

| Alpha-Glucosidase inhibitors (acarbose)         |                        |               |     |                   |                                                        |
|-------------------------------------------------|------------------------|---------------|-----|-------------------|--------------------------------------------------------|
| Any adverse effects (mostly GI)                 | OR: 3.37               | (2.60-4.36)   | N/A | Laar (2005)       | MA                                                     |
| Cancer                                          | RR: 1.1                | (1.05-1.15)   | Yes | Wu (2014)         | MA of 44 cohort, 39 case-control studies, and 182 RCTs |
| Gastrointestinal effects (flatulence, diarrhea) | 15-30% incidence       | --            | N/A | Bolen (2007)      | SR                                                     |
| DPP4 Inhibitors                                 |                        |               |     |                   |                                                        |
| Abdominal pain or discomfort                    | RR: 0.4 (+ metformin)  | (0.15-1.01)   | No  | Kawalec (2014)    | MA of 20 RCTs                                          |
| All-cause mortality                             | HR: 0.81 (linagliptin) | (0.36-1.81)   | No  | Rosenstock (2015) | Pooled analysis of 17 RCTs                             |
|                                                 | OR: 1.00               | (0.9-1.13)    | No  | Agarwal (2014)    | MA of 82 RCTs                                          |
|                                                 | RR: 1.064 (short-term) | (0.564-2.005) | No  | Savarese (2014)   | MA of 94 RCTs                                          |
|                                                 | RR: 1.012 (long-term)  | (0.909-1.126) | No  | Savarese (2014)   | MA of 94 RCTs                                          |
| Arthralgia                                      | RR: 1.3 (+ metformin)  | (0.77-2.19)   | No  | Kawalec (2014)    | MA of 20 RCTs                                          |
| Back pain                                       | RR: 0.8 (+ metformin)  | (0.51-1.18)   | No  | Kawalec (2014)    | MA of 20 RCTs                                          |
| Bronchitis                                      | RR: 1.1 (+ metformin)  | (0.56-2.15)   | No  | Kawalec (2014)    | MA of 20 RCTs                                          |
| Cancer incidence                                | RR: 0.92               | (0.82-1.04)   | No  | Wu (2015)         | MA of 1 case-control, 2 cohort, 59 RCTs                |

|                      |                                 |               |    |                   |                            |
|----------------------|---------------------------------|---------------|----|-------------------|----------------------------|
| Constipation         | RR: 1.43 (+ metformin)          | (0.49-4.14)   | No | Kawalec (2014)    | MA of 20 RCTs              |
| Cough                | RR: 1.02 (vs. SUs; + metformin) | (0.86-1.23)   | No | Mishriky (2015)   | MA of 16 RCTs              |
|                      | RR: 1.21 (+ metformin)          | (0.68-2.18)   | No | Kawalec (2014)    | MA of 20 RCTs              |
| CV mortality         | HR: 0.88 (linagliptin)          | (0.3-2.55)    | No | Rosenstock (2015) | Pooled analysis of 17 RCTs |
|                      | OR: 0.95                        | (0.82-1.09)   | No | Agarwal (2014)    | SR of 82 RCTs              |
|                      | RR: 1.031 (short-term)          | (0.514-2.067) | No | Savarese (2014)   | MA of 94 RCTs              |
|                      | RR: 0.962 (long-term)           | (0.843-1.098) | No | Savarese (2014)   | MA of 94 RCTs              |
| Diarrhea             | RR: 1.01 (vs. SUs; + metformin) | (0.88-1.14)   | No | Mishriky (2015)   | MA of 16 RCTs              |
|                      | RR: 0.78 (+ metformin)          | (0.59-1.01)   | No | Kawalec (2014)    | MA of 20 RCTs              |
| Dyspepsia            | RR: 1.02 (+ metformin)          | (0.43-2.42)   | No | Kawalec (2014)    | MA of 20 RCTs              |
| Dizziness            | RR: 1.49 (+ metformin)          | (0.76-2.92)   | No | Kawalec (2014)    | MA of 20 RCTs              |
| Fatigue              | RR: 0.76 (vs. SUs; + metformin) | (0.53-1.08)   | No | Mishriky (2015)   | MA of 16 RCTs              |
|                      | RR: 2.03 (+ metformin)          | (0.64-6.47)   | No | Kawalec (2014)    | MA of 20 RCTs              |
| Gastrointestinal AEs | RR: 0.91 (+ metformin)          | (0.75-1.09)   | No | Kawalec (2014)    | MA of 20 RCTs              |

|                          |                                                                               |               |     |                   |                                                                                                           |
|--------------------------|-------------------------------------------------------------------------------|---------------|-----|-------------------|-----------------------------------------------------------------------------------------------------------|
| Genital tract infections | RR: 1.0 (+ metformin)                                                         | (0.06-15.65)  | No  | Kawalec (2014)    | MA of 20 RCTs                                                                                             |
| Headache                 | RR: 0.98 (+ metformin)                                                        | (0.7-1.35)    | No  | Kawalec (2014)    | MA of 20 RCTs                                                                                             |
| Heart failure*           | RR: 1.25                                                                      | (1.08-1.45)   | Yes | Udell (2015)      | MA of 14 RCTs                                                                                             |
|                          | HR: 1.04 (linagliptin; hospitalization for unstable congestive heart failure) | (0.43-2.47)   | No  | Rosenstock (2015) | Pooled analysis of 19 RCTs (17 placebo-controlled; 1 active agent/placebo control; 1 active control only) |
|                          | OR: 1.19                                                                      | (1.03-1.37)   | Yes | Monami (2014)     | MA of 84 RCTs                                                                                             |
|                          | RR: 0.668 (short-term; new onset)                                             | (0.318-1.4)   | No  | Savarese (2014)   | MA of 94 RCTs                                                                                             |
|                          | RR: 1.158 (long-term; new onset)                                              | (1.011-1.326) | Yes | Savarese (2014)   | MA of 94 RCTs                                                                                             |
| Hypertension             | RR: 0.77 (+ metformin)                                                        | (0.5-1.18)    | No  | Kawalec (2014)    | MA of 20 RCTs                                                                                             |
| Hypoglycemia             | RR: 0.12 (+ metformin vs. SU + metformin)                                     | (0.1-0.15)    | Yes | Foroutan (2016)   | MA of 5 RCTs                                                                                              |
|                          | RR: 0.14 (+ metformin; vs. SU + metformin)                                    | (0.1-0.2)     | Yes | Mishriky (2015)   | MA of 16 RCTs                                                                                             |
|                          | RR: 0.85 (+ metformin)                                                        | (0.53-1.36)   | No  | Kawalec (2014)    | MA of 20 RCTs                                                                                             |
| Influenza                | RR: 0.81 (+ metformin)                                                        | (0.57-1.16)   | No  | Kawalec (2014)    | MA of 20 RCTs                                                                                             |



|                           |                                                                 |             |    |                   |                                                                                                           |
|---------------------------|-----------------------------------------------------------------|-------------|----|-------------------|-----------------------------------------------------------------------------------------------------------|
| MACE                      | HR: 0.82<br>(linagliptin)                                       | (0.61-1.09) | No | Rosenstock (2015) | Pooled analysis of 19 RCTs (17 placebo-controlled; 1 active agent/placebo control; 1 active control only) |
|                           | HR: 0.78<br>(linagliptin; composite of 4 MACE)                  | (0.55-1.12) | No | Rosenstock (2015) | Pooled analysis of 19 RCTs (17 placebo-controlled; 1 active agent/placebo control; 1 active control only) |
|                           | HR: 1.09<br>(linagliptin; composite of 4 MACE vs. placebo only) | (0.68-1.75) | No | Rosenstock (2015) | Pooled analysis of 19 RCTs (17 placebo-controlled; 1 active agent/placebo control; 1 active control only) |
|                           | OR: 0.95                                                        | (0.86-1.04) | No | Agarwal (2014)    | MA of 82 RCTs                                                                                             |
| Musculoskeletal disorders | RR: 1.02 (vs. SUs; + metformin)                                 | (0.83-1.25) | No | Mishriky (2015)   | MA of 16 RCTs                                                                                             |
| Myocardial infarction     | HR: 0.86<br>(linagliptin; nonfatal)                             | (0.47-1.56) | No | Rosenstock (2015) | Pooled analysis of 19 RCTs (17 placebo-controlled; 1 active agent/placebo control; 1 active control only) |

|                                               |                                                          |               |     |                   |                                                                            |
|-----------------------------------------------|----------------------------------------------------------|---------------|-----|-------------------|----------------------------------------------------------------------------|
|                                               | OR: 0.98                                                 | (0.86-1.10)   | No  | Agarwal (2014)    | SR of 82 RCTs                                                              |
|                                               | RR: 0.584 (short-term)                                   | (0.361-0.943) | Yes | Savarese (2014)   | MA of 94 RCTs                                                              |
|                                               | RR: 0.939 (long-term)                                    | (0.835-1.056) | No  | Savarese (2014)   | MA of 94 RCTs                                                              |
| Nasopharyngitis                               | RR: 1.05 (vs. SUs; + metformin)                          | (0.96-1.16)   | No  | Mishriky (2015)   | MA of 16 RCTs                                                              |
|                                               | RR: 0.94 (+ metformin)                                   | (0.75-1.17)   | No  | Kawalec (2014)    | MA of 20 RCTs                                                              |
| Nausea                                        | RR: 0.98 (vs. SUs; + metformin)                          | (0.75-1.28)   | No  | Mishriky (2015)   | MA of 16 RCTs                                                              |
|                                               | RR: 0.79 (+ metformin)                                   | (0.48-1.3)    | No  | Kawalec (2014)    | MA of 20 RCTs                                                              |
| Pain in extremity                             | RR: 0.63 (+ metformin)                                   | (0.38-1.02)   | No  | Kawalec (2014)    | MA of 20 RCTs                                                              |
| Pancreatitis                                  | OR: 1.82                                                 | (1.17-2.82)   | Yes | Roshanov (2015)   | MA of 3 RCTs                                                               |
|                                               | OR: 1.03 (incretin-based therapy, analyzed with GLP1RAs) | (0.87-1.2)    | No  | Wang (2015)       | MA of 7 cohort, 2 case-control studies                                     |
| Pollakiuria (i.e., daytime urinary frequency) | RR: 2.0 (+ metformin)                                    | (0.19-21.52)  | No  | Kawalec (2014)    | MA of 20 RCTs                                                              |
| Stroke                                        | HR: 0.34 (linagliptin; nonfatal)                         | (0.15-0.75)   | Yes | Rosenstock (2015) | Pooled analysis of 19 RCTs (17 placebo-controlled; 1 active agent/placebo) |

|                                               |                                    |               |     |                   |                                                                                                           |
|-----------------------------------------------|------------------------------------|---------------|-----|-------------------|-----------------------------------------------------------------------------------------------------------|
|                                               |                                    |               |     |                   | control; 1 active control only)                                                                           |
|                                               | OR: 0.98                           | (0.77-1.11)   | No  | Agarwal (2014)    | SR of 82 RCTs                                                                                             |
|                                               | RR: 0.665 (short-term)             | (0.365-1.213) | No  | Savarese (2014)   | MA of 94 RCTs                                                                                             |
|                                               | RR: 0.953 (long-term)              | (0.794-1.144) | No  | Savarese (2014)   | MA of 94 RCTs                                                                                             |
| Transient Ischemic Attack                     | HR: 0.09 (linagliptin)             | (0.01-0.75)   | Yes | Rosenstock (2015) | Pooled analysis of 19 RCTs (17 placebo-controlled; 1 active agent/placebo control; 1 active control only) |
| Tremor                                        | RR: 2.07 (+ metformin)             | (0.52-8.14)   | No  | Kawalec (2014)    | MA of 20 RCTs                                                                                             |
| Unstable angina pectoris with hospitalization | HR: 1.08 (linagliptin)             | (0.56-2.06)   | No  | Rosenstock (2015) | Pooled analysis of 19 RCTs (17 placebo-controlled; 1 active agent/placebo control; 1 active control only) |
| Urinary tract AEs                             | RR: 0.8 (+ metformin)              | (0.22-2.85)   | No  | Kawalec (2014)    | MA of 20 RCTs                                                                                             |
|                                               | RR: 1.15 (infections; + metformin) | (0.8-1.65)    | No  | Kawalec (2014)    | MA of 20 RCTs                                                                                             |
| Upper respiratory tract infections            | RR: 0.92 (+ metformin)             | (0.63-1.34)   | No  | Kawalec (2014)    | MA of 20 RCTs                                                                                             |

|                    |                                                                             |             |    |                |                                                               |
|--------------------|-----------------------------------------------------------------------------|-------------|----|----------------|---------------------------------------------------------------|
| Vomiting           | RR: 1.05 (+metformin)                                                       | (0.35-3.11) | No | Kawalec (2014) | MA of 20 RCTs                                                 |
| GLP1 Agonists      |                                                                             |             |    |                |                                                               |
| Acute pancreatitis | OR: 1.03 (incretin-based therapy, analyzed with GLP1RAs)                    | (0.87-1.2)  | No | Wang (2015)    | MA of 7 cohort, 2 case-control studies                        |
|                    | RR: 2.1 (liraglutide vs. active agents)                                     | (0.3-16)    | No | Jensen (2014)  | SR and pooled analysis of 18 RCTs (phase II and III studies)  |
|                    | RR: 1.7 (liraglutide vs. active agents excluding sitagliptin and exenatide) | (0.2-13.2)  | No | Jensen (2014)  | SR and pooled analysis of 18 RCTs (phase II and III studies)  |
|                    | OR: 1.11 (RCT)                                                              | (0.57-2.17) | No | Li (2014)      | MA of 55 RCTs, 3 retrospective cohort, 2 case-control studies |
|                    | OR: 1.01                                                                    | (0.37-2.76) | No | Monami (2013)  | MA of 9 RCTs                                                  |
|                    | OR: 0.87 (pooled)                                                           | (0.64-1.17) | No | Alves (2012)   | MA of 3 retrospective cohort, 22 RCTs                         |
| Bone fractures     | OR: 0.38 (liraglutide)                                                      | (0.17-0.87) | No | Su (2015)      | MA of 8 RCTs                                                  |
|                    | OR: 2.09 (exenatide)                                                        | (1.03-4.21) | No | Su (2015)      | MA of 10 RCTs                                                 |

|              |                                                                                        |             |     |                  |               |
|--------------|----------------------------------------------------------------------------------------|-------------|-----|------------------|---------------|
|              | OR: 0.75                                                                               | (0.28-2.02) | No  | Mabilleau (2013) | MA of 7 RCTs  |
| Diarrhea     | RR: 2.04 (dulaglutide vs. placebo, sitagliptin, exenatide, liraglutide or glargine)    | (1.57-2.65) | Yes | Zhang (2016)     | MA of 12 RCTs |
|              | RR: 2.85 (vs. insulin glargine)                                                        | (2.01-4.04) | Yes | Fu-peng (2014)   | MA of 7 RCTs  |
| Headache     | RR: 1.19 (vs. insulin glargine)                                                        | (0.92-1.54) | No  | Fu-peng (2014)   | MA of 7 RCTs  |
| Hypoglycemia | RR: 1.07 (dulaglutide vs. placebo, metformin or liraglutide)                           | (0.8-1.44)  | No  | Zhang (2016)     | MA of 12 RCTs |
|              | RR: 1.07 (dulaglutide + oral antihyperglycemics vs. placebo, metformin or liraglutide) | (0.89-1.3)  | No  | Zhang (2016)     | MA of 12 RCTs |
|              | RR: 1.12 (severe; vs. insulin glargine)                                                | (0.5-2.5)   | No  | Fu-peng (2014)   | MA of 7 RCTs  |
|              | RR: 0.56 (minor; vs. insulin glargine)                                                 | (0.34-0.95) | Yes | Fu-peng (2014)   | MA of 7 RCTs  |

|                                           |                                                                                     |              |     |                |                                                                    |
|-------------------------------------------|-------------------------------------------------------------------------------------|--------------|-----|----------------|--------------------------------------------------------------------|
| Nasopharyngitis                           | RR: 0.95 (vs. insulin glargine)                                                     | (0.79-1.14)  | No  | Fu-peng (2014) | MA of 7 RCTs                                                       |
|                                           | RR: 1.02                                                                            | (0.64-1.62)  | No  | Nikfar (2012)  | MA of 3 RCTs                                                       |
| Nausea                                    | RR: 2.64 (dulaglutide vs. placebo, sitagliptin, exenatide, liraglutide or glargine) | (1.69-4.12)  | Yes | Zhang (2016)   | MA of 12 RCTs                                                      |
|                                           | RR: 8.65 (vs. insulin glargine)                                                     | (6.03-12.40) | Yes | Fu-peng (2014) | MA of 7 RCTs                                                       |
| Overall cancer                            | OR: 1.24 (pooled)                                                                   | (0.68-2.27)  | No  | Alves (2012)   | MA of 3 retrospective cohort, 22 RCTs                              |
| Cancer incidence                          | RR: 1.12                                                                            | (0.61-2.06)  | No  | Wu (2015)      | MA of 2 cohort, 14 RCTs                                            |
| Vomiting                                  | RR: 2.58 (dulaglutide vs. placebo, sitagliptin, exenatide, liraglutide or glargine) | (1.53-4.35)  | Yes | Zhang (2016)   | MA of 12 RCTs                                                      |
|                                           | RR: 4.69 (vs. insulin glargine)                                                     | (3.26-6.75)  | Yes | Fu-peng (2014) | MA of 7 RCTs                                                       |
| Sodium-Glucose Cotransporter 2 Inhibitors |                                                                                     |              |     |                |                                                                    |
| Acidosis                                  | RR: 0.57 (from regulatory submissions)                                              | (0.02-14.10) | No  | Wu (2016)      | MA of 63 RCTs (57 scientific reports and 6 regulatory submissions) |

|                               |                                                                                |              |     |              |                                                                    |
|-------------------------------|--------------------------------------------------------------------------------|--------------|-----|--------------|--------------------------------------------------------------------|
|                               | RR: 1.99<br>(from scientific reports)                                          | (0.22-17.8)  | No  | Wu (2016)    | MA of 63 RCTs (57 scientific reports and 6 regulatory submissions) |
| AEs related to reported falls | HR: 1.24 (100 mg canagliflozin)                                                | (0.71-2.17)  | No  | Watts (2016) | Interim analysis of CANVAS <sup>  </sup>                           |
|                               | HR 0.84 (100 mg canagliflozin)                                                 | (0.46-1.54)  | No  | Watts 2016   | Pooled analysis from 9 RCTs (non-CANVAS studies)                   |
|                               | HR: 2.12 (300 mg canagliflozin)                                                | (1.28-3.51)  | Yes | Watts (2016) | Interim analysis of CANVAS <sup>  </sup>                           |
|                               | HR 1.13                                                                        | (0.65-1.96)  | No  | Watts (2016) | Pooled analysis from 9 RCTs (non-CANVAS studies)                   |
| Angina                        | RR: 0.95                                                                       | (0.73-1.23)  | No  | Wu (2016)    | MA of 63 RCTs (57 scientific reports and 6 regulatory submissions) |
| All-cause mortality           | RR: 0.71                                                                       | (0.61-0.83)  | Yes | Wu (2016)    | MA of 63 RCTs (57 scientific reports and 6 regulatory submissions) |
|                               | Effect estimate: 2.8 (empagliflozin + metformin vs. active agent) <sup>#</sup> | (0.12-68.22) | No  | Zhong (2016) | MA of 7 RCTs                                                       |

|                  |                                        |             |    |                |                                                                    |
|------------------|----------------------------------------|-------------|----|----------------|--------------------------------------------------------------------|
| Arthralgia       | RR: 0.2 (+ metformin)                  | (0.02-1.68) | No | Kawalec (2014) | MA of 20 RCTs                                                      |
| Back pain        | RR: 0.87 (+ metformin)                 | (0.37-2.05) | No | Kawalec (2014) | MA of 20 RCTs                                                      |
| Bone fracture    | HR: 1.44 (canagliflozin)               | (0.87-2.39) | No | Watts (2016)   | Analysis of CANVAS                                                 |
|                  | HR: 0.80 (canagliflozin)               | 0.49-1.29)  | No | Watts 2016     | Pooled analysis of 9 RCTs (non-CANVAS)                             |
|                  | RR: 0.99 (from regulatory submissions) | (0.82-1.21) | No | Wu (2016)      | MA of 63 RCTs (57 scientific reports and 6 regulatory submissions) |
|                  | RR: 0.96 (from scientific reports)     | (0.78-1.18) | No | Wu (2016)      | MA of 63 RCTs (57 scientific reports and 6 regulatory submissions) |
| Cancer incidence | RR: 0.90 (dapagliflozin)               | (0.49-1.65) | No | Wu (2015)      | MA 7 studies                                                       |
| Cancer           | RR: 1.07 (from regulatory submissions) | (0.85-1.34) | No | Wu (2016)      | MA of 63 RCTs (57 scientific reports and 6 regulatory submissions) |
|                  | RR: 0.72 (from scientific reports)     | (0.34-1.54) | No | Wu (2016)      | MA of 63 RCTs (57 scientific reports and 6 regulatory submissions) |



|                          |                                                                            |              |     |                   |                                                                                |
|--------------------------|----------------------------------------------------------------------------|--------------|-----|-------------------|--------------------------------------------------------------------------------|
| Constipation             | OR: 0.7<br>(dapagliflozin)                                                 | (0.4-1.22)   | No  | Musso<br>(2011)   | MA of 13 RCTs                                                                  |
| Cough                    | RR: 0.43 (+<br>metformin)                                                  | (0.16-1.13)  | No  | Kawalec<br>(2014) | MA of 20 RCTs                                                                  |
| CV mortality             | RR: 0.63                                                                   | (0.5-0.85)   | Yes | Wu<br>(2016)      | MA of 63 RCTs<br>(57 scientific<br>reports and 6<br>regulatory<br>submissions) |
| Diarrhea                 | RR: 0.74 (+<br>metformin)                                                  | (0.37-1.48)  | No  | Kawalec<br>(2014) | MA of 20 RCTs                                                                  |
|                          | OR: 0.94<br>(dapagliflozin)                                                | (0.65-1.37)  | No  | Musso<br>(2011)   | MA of 13 RCTs                                                                  |
| Fatigue                  | RR: 3.0 (+<br>metformin)                                                   | (0.13-69.09) | No  | Kawalec<br>(2014) | MA of 20 RCTs                                                                  |
| Gastrointestinal AEs     | RR: 1.0 (+<br>metformin)                                                   | (0.23-4.31)  | No  | Kawalec<br>(2014) | MA of 20 RCTs                                                                  |
| Genital tract infections | RR: 4.75<br>(from<br>regulatory<br>submissions)                            | (4.0-5.63)   | Yes | Wu<br>(2016)      | MA of 63 RCTs<br>(57 scientific<br>reports and 6<br>regulatory<br>submissions) |
|                          | RR: 2.88<br>(from<br>scientific<br>reports)                                | (2.48-3.34)  | Yes | Wu<br>(2016)      | MA of 63 RCTs<br>(57 scientific<br>reports and 6<br>regulatory<br>submissions) |
|                          | Effect<br>estimate:<br>6.67<br>(empagliflozin +<br>metformin) <sup>#</sup> | (1.15-38.79) | No  | Zhong<br>(2016)   | MA of 7 RCTs                                                                   |

|  |                                                                                       |              |     |                |                            |
|--|---------------------------------------------------------------------------------------|--------------|-----|----------------|----------------------------|
|  | Effect estimate:<br>3.49<br>(empagliflozin + metformin vs. active agent) <sup>#</sup> | (1.39-8/81)  | No  | Zhong (2016)   | MA of 7 RCTs               |
|  | RR: 5.13<br>(canagliflozin vs. sitagliptin)                                           | (2.92-9.01)  | Yes | Kaur (2015)    | MA of 5 RCTs               |
|  | RR: 11.96<br>(males; canagliflozin vs. sitagliptin)                                   | (2.84-50.41) | Yes | Kaur (2015)    | MA of 5 RCTs               |
|  | RR: 3.99<br>(females; canagliflozin vs. sitagliptin)                                  | (2.15-7.4)   | Yes | Kaur (2015)    | MA of 5 RCTs               |
|  | RR: 2.36 (+ metformin)                                                                | (1.17-4.74)  | Yes | Kawalec (2014) | MA of 20 RCTs              |
|  | OR: 4.39 (10 mg empagliflozin)                                                        | (2.1-9.19)   | Yes | Liakos (2014)  | MA of 10 RCTs              |
|  | OR: 3.31 (25 mg empagliflozin)                                                        | (1.55-7.09)  | Yes | Liakos (2014)  | MA of 10 RCTs              |
|  | RR: 3.76                                                                              | (2.23-6.35)  | Yes | Yang (2014)    | MA of 10 RCTs              |
|  | OR: 3.32                                                                              | (2.40-4.59)  | Yes | Monami (2013)  | MA of 21 RCTs <sup>+</sup> |

|              |                                                                                 |             |     |                  |                                                                    |
|--------------|---------------------------------------------------------------------------------|-------------|-----|------------------|--------------------------------------------------------------------|
|              | OR: 4.81                                                                        | (2.97-7.81) | N/A | Vasilakou (2013) | MA of 20 studies <sup>+</sup>                                      |
|              | RR: 3.42 (dapagliflozin)                                                        | (2.19-5.33) | Yes | Clar (2012)      | SR of 7 RCTs                                                       |
|              | OR: 3.57 (dapagliflozin)                                                        | (2.59-4.93) | Yes | Musso (2011)     | MA of 13 RCTs                                                      |
| Headache     | RR: 1.29 (+ metformin)                                                          | (0.65-2.56) | No  | Kawalec (2014)   | MA of 20 RCTs                                                      |
|              | OR: 0.69 (dapagliflozin)                                                        | (0.48-0.97) | Yes | Musso (2011)     | MA of 13 RCTs                                                      |
| Hypoglycemia | RR: 1.0 (from regulatory submissions)                                           | (0.94-1.07) | No  | Wu (2016)        | MA of 63 RCTs (57 scientific reports and 6 regulatory submissions) |
|              | RR: 0.95 (from scientific reports)                                              | (0.91-1.0)  | Yes | Wu (2016)        | MA of 63 RCTs (57 scientific reports and 6 regulatory submissions) |
|              | Effect estimate: 1.59 (empagliflozin + metformin) <sup>#</sup>                  | (0.77-3.3)  | No  | Zhong (2016)     | MA of 7 RCTs                                                       |
|              | Effect estimate: 3.49 (empagliflozin + metformin vs. active agent) <sup>#</sup> | (0.15-1.53) | No  | Zhong (2016)     | MA of 7 RCTs                                                       |

|                |                                        |             |     |                  |                                                                    |
|----------------|----------------------------------------|-------------|-----|------------------|--------------------------------------------------------------------|
|                | RR: 1.02 (+ metformin)                 | (0.44-2.38) | No  | Kawalec (2014)   | MA of 20 RCTs                                                      |
|                | OR: 1.28 (10 mg empagliflozin)         | (0.97-1.7)  | No  | Liakos (2014)    | MA of 10 RCTs                                                      |
|                | OR: 1.10 (25 mg empagliflozin)         | (0.87-1.39) | No  | Liakos (2014)    | MA of 10 RCTs                                                      |
|                | RR: 1.13                               | (0.40-3.20) | No  | Yang (2014)      | MA of 10 RCTs                                                      |
|                | OR: 1.34                               | (1.09-1.65) | Yes | Monami (2013)    | MA of 22 RCTs                                                      |
|                | OR: 1.28                               | (0.99-1.65) | N/A | Vasilakou (2013) | MA of 21 studies <sup>+</sup>                                      |
|                | OR: 1.27 (dapagliflozin + insulin)     | (1.05-1.53) | Yes | Musso (2011)     | MA of 13 RCTs                                                      |
|                | OR: 1.31 (dapagliflozin – insulin)     | (0.93-1.86) | No  | Musso (2011)     | MA of 13 RCTs                                                      |
| Hypertension   | RR: 1.08 (+ metformin)                 | (0.52-2.22) | No  | Kawalec (2014)   | MA of 20 RCTs                                                      |
| Influenza      | RR: 1.14 (+ metformin)                 | (0.58-2.24) | No  | Kawalec (2014)   | MA of 20 RCTs                                                      |
| Kidney disease | RR: 1.21 (from regulatory submissions) | (0.91-1.62) | No  | Wu (2016)        | MA of 63 RCTs (57 scientific reports and 6 regulatory submissions) |
|                | RR: 0.83 (from scientific reports)     | (0.69-1.0)  | Yes | Wu (2016)        | MA of 63 RCTs (57 scientific reports and 6 regulatory              |

|                                                     |                                          |              |     |                |                                                                    |
|-----------------------------------------------------|------------------------------------------|--------------|-----|----------------|--------------------------------------------------------------------|
|                                                     |                                          |              |     |                | submissions)                                                       |
| Major CV events                                     | RR: 0.84                                 | (0.75-0.95)  | Yes | Wu (2016)      | MA of 63 RCTs (57 scientific reports and 6 regulatory submissions) |
| Nausea                                              | RR: 4.58 (+ metformin)                   | (0.53-39.36) | No  | Kawalec (2014) | MA of 20 RCTs                                                      |
| Nasopharyngitis                                     | RR: 0.79 (+ metformin)                   | (0.46-1.36)  | No  | Kawalec (2014) | MA of 20 RCTs                                                      |
|                                                     | OR: 0.95 (dapagliflozin)                 | (0.68-1.33)  | No  | Musso (2011)   | MA of 13 RCTs                                                      |
| Nonfatal myocardial infarction                      | RR: 0.88                                 | (0.72-1.07)  | No  | Wu (2016)      | MA of 63 RCTs (57 scientific reports and 6 regulatory submissions) |
| Nonfatal stroke                                     | RR: 1.3                                  | (1.0-1.68)   | Yes | Wu (2016)      | MA of 63 RCTs (57 scientific reports and 6 regulatory submissions) |
| Osmotic diuresis related AE (diarrhea, pollakiuria) | RR: 3.09 (canagliflozin vs. sitagliptin) | (0.88-10.87) | No  | Kaur (2015)    | MA of 5 RCTs                                                       |
|                                                     | RR: 1.01 (+ metformin; pollakiuria)      | (0.2-5.09)   | No  | Kawalec (2014) | MA of 20 RCTs                                                      |
|                                                     | RR: 3.93                                 | (2.25-6.86)  | Yes | Yang (2014)    | MA of 10 RCTs                                                      |
| Tremor                                              | RR: 3.0 (+ metformin)                    | (0.13-69.09) | No  | Kawalec (2014) | MA of 20 RCTs                                                      |

|                    |                                                                                    |             |     |              |                                                                    |
|--------------------|------------------------------------------------------------------------------------|-------------|-----|--------------|--------------------------------------------------------------------|
| Thromboembolism    | RR: 1.54<br>(from regulatory submissions)                                          | (0.63-3.79) | No  | Wu (2016)    | MA of 63 RCTs (57 scientific reports and 6 regulatory submissions) |
|                    | RR: 0.75<br>(from scientific reports)                                              | (0.42-1.31) | No  | Wu (2016)    | MA of 63 RCTs (57 scientific reports and 6 regulatory submissions) |
| Urinary infections | RR: 1.15<br>(from regulatory submissions)                                          | (1.06-1.26) | Yes | Wu (2016)    | MA of 63 RCTs (57 scientific reports and 6 regulatory submissions) |
|                    | RR: 1.02<br>(from scientific reports)                                              | (0.95-1.1)  | Yes | Wu (2016)    | MA of 63 RCTs (57 scientific reports and 6 regulatory submissions) |
|                    | Effect estimate: 1.24<br>(empagliflozin + metformin) <sup>#</sup>                  | (0.86-1.81) | No  | Zhong (2016) | MA of 7 RCTs                                                       |
|                    | Effect estimate: 0.76<br>(empagliflozin + metformin vs. active agent) <sup>#</sup> | (0.48-1.22) | No  | Zhong (2016) | MA of 7 RCTs                                                       |
|                    | RR: 0.75<br>(canagliflozin vs. sitagliptin)                                        | (0.48-1.16) | No  | Kaur (2015)  | MA of 5 RCTs                                                       |

|                                    |                                                 |             |     |                  |                                          |
|------------------------------------|-------------------------------------------------|-------------|-----|------------------|------------------------------------------|
|                                    | RR: 1.02 (+ metformin)                          | (0.54-1.91) | No  | Kawalec (2014)   | MA of 20 RCTs                            |
|                                    | RR: 1.11 (+ metformin; reported as urinary AEs) | (0.68-1.83) | No  | Kawalec (2014)   | MA of 20 RCTs                            |
|                                    | OR: 1.2 (10 mg empagliflozin)                   | (0.92-1.57) | No  | Liakos (2014)    | MA of 10 RCTs                            |
|                                    | OR: 1.03 (25 mg empagliflozin)                  | (0.81-1.32) | No  | Liakos (2014)    | MA of 10 RCTs                            |
|                                    | RR: 1.19                                        | (0.82-1.73) | No  | Yang (2014)      | MA of 10 RCTs                            |
|                                    | OR: 1.23                                        | (0.99-1.52) | Yes | Monami (2013)    | MA of 21 RCTs <sup>+</sup>               |
|                                    | OR: 1.34                                        | (1.03-1.74) | N/A | Vasilakou (2013) | MA of 21 studies                         |
|                                    | RR: 1.44 (dapagliflozin)                        | (1.05-1.98) | Yes | Clar (2012)      | SR of 7 RCTs                             |
|                                    | OR: 1.34 (dapagliflozin)                        | (1.05-1.71) | Yes | Musso (2011)     | MA of 13 RCTs                            |
| Upper respiratory tract infections | RR: 0.4 (+ metformin)                           | (0.18-0.91) | Yes | Kawalec (2014)   | MA of 20 RCTs                            |
| Volume depletion related AE        | HR: 1.32 (100 mg canagliflozin)                 | (0.94-1.87) | No  | Watts (2016)     | Interim analysis of CANVAS <sup>  </sup> |

|          |                                                   |              |     |                   |                                                                                |
|----------|---------------------------------------------------|--------------|-----|-------------------|--------------------------------------------------------------------------------|
|          | HR: 1.76<br>(300 mg<br>canagliflozin)             | (1.27-2.44)  | Yes | Watts<br>(2016)   | Interim analysis<br>of CANVAS <sup>  </sup>                                    |
|          | RR: 1.53<br>(from<br>regulatory<br>submissions)   | (1.27-1.83)  | Yes | Wu<br>(2016)      | MA of 63 RCTs<br>(57 scientific<br>reports and 6<br>regulatory<br>submissions) |
|          | RR: 1.16<br>(from<br>scientific<br>reports)       | (0.98-1.38)  | No  | Wu<br>(2016)      | MA of 63 RCTs<br>(57 scientific<br>reports and 6<br>regulatory<br>submissions) |
|          | RR: 0.76<br>(canagliflozin<br>vs.<br>sitagliptin) | (0.04-15.41) | No  | Kaur<br>(2015)    | MA of 5 RCTs                                                                   |
| Vomiting | RR: 3.0 (+<br>metformin)                          | (0.13-69.09) | No  | Kawalec<br>(2014) | MA of 20 RCTs                                                                  |

RR – relative risk

OR – odds ratio

HR – hazard ratio

MD – mean difference

SR – systematic review

MA – Meta-analysis

ARD – Absolute risk difference

\* - This is a summary of findings from our review of reviews of harms. Readers are referred to the ORIGIN trial which examined insulin glargine compared to standard care for a median 6 years and showed neutral effects for overall cancer, cancer-related deaths and specific cancers . Readers are referred to the TECOS trial which examined the addition of sitagliptin to usual care for a median of 3 years in patients with type 2 diabetes and cardiovascular disease. Sitagliptin was noninferior to placebo for the primary composite cardiovascular outcome (composite of cardiovascular death, nonfatal myocardial infarction, nonfatal stroke, or hospitalization for unstable angina) (hazard ratio, 0.98; 95% CI, 0.88 to 1.09; P<0.001). Rates of hospitalization for heart failure did not differ between the two groups (hazard ratio, 1.00; 95% CI, 0.83 to 1.20; P=0.98).

<sup>+</sup> - No breakdown of study type per AE (also high risk of bias)

# Empagliflozin 10 mg (review also presented data for 25 mg dose)

<sup>||</sup> CANVAS – From interim analysis of RCT called CANagliflozin cardioVascular Assessment Study (CANVAS) comparing canagliflozin 100 mg, 300 mg and placebo in addition to standard



care for type 2 diabetes management(50% insulin, 47% sulfonylurea) in patients with high risk for CV disease [52]

## References

1. Wu L, Zhu J, Prokop L, Murad M. Pharmacologic Therapy of Diabetes and Overall Cancer Risk and Mortality: A Meta-Analysis of 265 Studies. *Sci Rep*. 2015;15(5):10147.
2. Salpeter S, Greyber E, Pasternak G, Salpeter E. Risk of fatal and nonfatal lactic acidosis with metformin use in type 2 diabetes mellitus (Review). *Cochrane Libr*. 2010;(1).
3. Inzucchi S, Lipska K, Mayo H, Bailey C, McGuire D. Metformin in Patients With Type 2 Diabetes and Kidney Disease: A Systematic Review. *JAMA*. 2014;312(24):2668–75.
4. Liu Q, Li S, Quan H, Li J. Vitamin B12 status in metformin treated patients: systematic review. *PLoS One*. 2014;9(6):1–6.
5. Bronsveld H, Braak B, Karlstad O, Vestergaard P, Starup-Linde J, Bazelier M, et al. Treatment with insulin (analogues) and breast cancer risk in diabetics; a systematic review and meta-analysis of in vitro, animal and human evidence. *Breast Cancer Res*. 2015;17(100).
6. Bu W, Song L, Zhao D, Guo B, Liu J. Insulin therapy and the risk of colorectal cancer in patients with type 2 diabetes: a meta-analysis of observational studies. *Br J Clin Pharmacol*. 2014;78(2):301–9.
7. Singh S, Singh H, Singh PP, Murad MH, Limburg PJ. Antidiabetic medications and the risk of colorectal cancer in patients with diabetes mellitus: a systematic review and meta-analysis. *Cancer Epidemiol Biomarkers Prev*. 2013;22(12):2258–68.
8. Singh S, Singh PP, Singh AG, Murad MH, Sanchez W. Anti-diabetic medications and the risk of hepatocellular cancer: a systematic review and meta-analysis. *Am J Gastroenterol*. 2013;108(6):881–91.
9. Wang L, Cai S, Teng Z, Zhao X, Chen X, Bai X. Insulin therapy contributes to the increased risk of colorectal cancer in diabetes patients : a meta-analysis. *Diagn Pathol*. 2013;8(180):2–5.
10. Janghorbani M, Dehghani M, Salehi-Marzijarani M. Systematic review and meta-analysis of insulin therapy and risk of cancer. *Horm Cancer*. 2012;3(4):137–46.
11. Zhao C, Wang W, Xu D, Li H, Li M, Wang F. Insulin and risk of diabetic retinopathy in patients with type 2 diabetes mellitus: data from a meta-analysis of seven cohort studies. *Diagn Pathol*. 2014;9(1):130.
12. Udell J, Cavender M, Bhatt D, Chatterjee S, Farkouh M, Scirica B. Glucose-lowering drugs or strategies and cardiovascular outcomes in patients with or at risk for type 2 diabetes: a meta-analysis of randomised controlled trials. *Lancet Diabetes Endocrinol*. 2015;3(5):356–66.

13. Zhang L, Zhang M, Zhang Y, Tong N. Efficacy and safety of dulaglutide in patients with type 2 diabetes: a meta-analysis and systematic review. *Sci Rep.* 2016;6:18904.
14. Thakkar B, Aronis KN, Vamvini MT, Shields K, Mantzoros CS. Metformin and sulfonylureas in relation to cancer risk in type II diabetes patients: a meta-analysis using primary data of published studies. *Metabolism.* 2013;62(7):922–34.
15. Forst T, Hanefeld M, Jacob S, Moeser G, Schwenk G, Pfützner A, et al. Association of sulphonylurea treatment with all-cause and cardiovascular mortality: a systematic review and meta-analysis of observational studies. *Diabetes Vasc Dis Res.* 2013;10(4):302–14.
16. Monami M, Genovese S, Mannucci E. Cardiovascular safety of sulfonylureas: a meta-analysis of randomized clinical trials. *Diabetes Obes Metab.* 2013;15(10):938–53.
17. Phung OJ, Schwartzman E, Allen RW, Engel SS, Rajpathak SN. Sulphonylureas and risk of cardiovascular disease: systematic review and meta-analysis. *Diabet Med.* 2013;30(10):1160–71.
18. Chan S, Colagiuri S. Systematic review and meta-analysis of the efficacy and hypoglycemic safety of gliclazide versus other insulinotropic agents. *Diabetes Res Clin Pract.* 2015;110:75–81.
19. Varas-lorenzo C, Margulis A V, Pladevall M, Riera-guardia N, Calingaert B, Hazell L, et al. The risk of heart failure associated with the use of noninsulin blood glucose-lowering drugs : systematic review and meta-analysis of published observational studies. *BMC Cardiovasc Disord.* 2014;14(129).
20. Pladevall M, Riera-Guardia N, Margulis A V, Varas-Lorenzo C, Calingaert B, Perez-Gutthann S. Cardiovascular risk associated with the use of glitazones, metformin and sufonylureas: meta-analysis of published observational studies. *BMC Cardiovasc Disord.* 2016;16:14.
21. Bosetti C, Rosato V, Buniato D, Zambon A, La Vecchia C, Corrao G. Cancer risk for patients using thiazolidinediones for type 2 diabetes: a meta-analysis. *Oncologist.* 2013;18(2):148–56.
22. Ferwana M, Firwana B, Hasan R, Al-Mallah MH, Kim S, Montori VM, et al. Pioglitazone and risk of bladder cancer: a meta-analysis of controlled studies. *Diabet Med.* 2013;30(9):1026–32.
23. Turner R, Kwok CS, Chen-Turner C, Maduakor CA, Singh S, Loke Y. Thiazolidinediones and associated risk of bladder cancer: a systematic review and meta-analysis. *British J Clin Pharmacol.* 2013;78(2):258–73.
24. Colmers I, Bowker S, Majumdar S, Johnson J. among people with type 2 diabetes : a meta-analysis. *CMAJ.* 2012;184(12):E675–83.
25. Hernandez A, Usmani A, Rajamanickam A, Moheet A. Thiazolidinediones and Risk of Heart Failure in Patients with or at High Risk of Type 2 Diabetes Mellitus. *Am J Cardiovasc Drugs.* 2011;11(2):115–28.

26. Berlie HD, Garwood CL. Diabetes medications related to an increased risk of falls and fall-related morbidity in the elderly. *Ann Pharmacother*. 2010;44(4):712–7.
27. Zhu Z-N, Jiang Y-F, Ding T. Risk of fracture with thiazolidinediones: an updated meta-analysis of randomized clinical trials. *Bone*. 2014;68:115–23.
28. Loke Y, Singh S, Furberg C. Long-term use of thiazolidinediones and fractures in type 2 diabetes: a meta-analysis. *CMAJ*. 2009;180(1):32–9.
29. Clar C, Royle P, Waugh N. Adding pioglitazone to insulin containing regimens in type 2 diabetes: systematic review and meta-analysis. *PLoS One*. 2009;4(7):e6112.
30. Nissen SE, Wolski K. Rosiglitazone revisited: an updated meta-analysis of risk for myocardial infarction and cardiovascular mortality. *Arch Intern Med*. 2010;170(14):1191–201.
31. Singh S, Loke YK, Furberg CD. Long-term use of thiazolidinediones and the associated risk of pneumonia or lower respiratory tract infection: systematic review and meta-analysis. *Thorax*. 2011;66(5):383–8.
32. Monami M, Cremasco F, Lamanna C. Predictors of response to dipeptidyl peptidase-4 inhibitors: evidence from randomized clinical trials. *Diabetes Metab Res Rev*. 2011;27(4):362–72.
33. Mogensen UM, Andersson C, Fosbøl EL, Schramm TK, Vaag A, Scheller NM, et al. Metformin in combination with various insulin secretagogues in type 2 diabetes and associated risk of cardiovascular morbidity and mortality--a retrospective nationwide study. *Diabetes Res Clin Pract*. 2015;107(1):104–12.
34. Yin J, Deng H, Qin S, Tang W, Zeng L, Zhou B. Comparison of repaglinide and metformin versus metformin alone for type 2 diabetes : a meta-analysis of randomized controlled trials. *Diabetes Res Clin Pract*. 2014;105(3):e10–5.
35. Bolen S, Feldman L, Vassy J, Wilson L, Yeh H. Comparative Effectiveness and Safety of Oral Medications for Type 2 Diabetes Mellitus. *Ann Fam Med*. 2007;147:386–99.
36. Van de Laar F, Lucassen P, Akkermans R, van de Lisdonk E, Rutten G, van Weel C. Alpha-Glucosidase Inhibitors for Patients with Type 2 Diabetes: Results from a Cochrane systematic review and meta-analysis. *Diabetes Care*. 2005;28(1):166–75.
37. Kawalec P, Mikrut A, Lopuch S. The safety of dipeptidyl peptidase-4 (DPP-4) inhibitors or sodium-glucose cotransporter 2 (SGLT-2) inhibitors added to metformin background therapy in patients with type 2 diabetes mellitus: a systematic review and meta-analysis. *Diabetes Metab Res Rev*. 2014;30(269-83).
38. Rosenstock J, Marx N, Neubacher D, Seck T, Patel S, Woerle H-J, et al. Cardiovascular safety of linagliptin in type 2 diabetes: a comprehensive patient-level pooled analysis of prospectively adjudicated cardiovascular events. *Cardiovasc Diabetol*. 2015;14:57.

39. Agarwal S, Parashar A, Menon V. Meta-analysis of the cardiovascular outcomes with dipeptidyl peptidase 4 inhibitors: validation of the current FDA mandate. *Am J Cardiovasc Drugs*. 2014;14(3):191–207.
40. Savarese G, Perrone-Filardi P, D'Amore C, Vitale C, Trimarco B, Pani L, et al. Cardiovascular effects of dipeptidyl peptidase-4 inhibitors in diabetic patients: A meta-analysis. *Int J Cardiol*. 2015;181:239–44.
41. Mishriky B, Cummings D, Tanenberg R. The efficacy and safety of DPP4 inhibitors compared to sulfonylureas as add-on therapy to metformin in patients with Type 2 diabetes: A systematic review and meta-analysis. *Diabetes Res Clin Pract*. 2015;109:378–88.
42. Foroutan N, Muratov S, Levine M. Safety and efficacy of dipeptidyl peptidase-4 inhibitors vs sulfonylurea in metformin-based combination therapy for type 2 diabetes mellitus: Systematic review and meta-analysis. *Clin Invest Med*. 2016;39(2):E48–62.
43. Roshanov P, Dennis B. Incretin-based therapies are associated with acute pancreatitis: Meta-analysis of large randomized controlled trials. *Diabetes Res Clin Pract*. 2015;110:e13–7.
44. Wang T, Wang F, Gou Z, Tang H, Li C, Shi L, et al. Using real-world data to evaluate the association of incretin-based therapies with risk of acute pancreatitis: a meta-analysis of 1 324 515 patients from observational studies. *Diabetes Obes Metab*. 2015;17:32–41.
45. Jensen T, Saha K, Steinberg W. Is There a Link Between Liraglutide and Pancreatitis? A Post Hoc Review of Pooled and Patient-Level Data From Completed Liraglutide Type 2 Diabetes Clinical Trials. *Diabetes Care*. 2015;38(6):1058–66.
46. Li L, Shen J, Bala MM, Olav P, Rios LP, Malaga G, et al. Incretin treatment and risk of pancreatitis in patients with type 2 diabetes mellitus : systematic review and meta-analysis of randomised and non-randomised. *BMJ*. 2014;348(g2366).
47. Alves C, Batel-Marques F, Macedo AF. A meta-analysis of serious adverse events reported with exenatide and liraglutide: acute pancreatitis and cancer. *Diabetes Res Clin Pract*. 2012;98(2):271–84.
48. Su B, Sheng H, Zhang M, Bu L, Yang P, Li L, et al. Risk of bone fractures associated with glucagon-like peptide-1 receptor agonists' treatment: a meta-analysis of randomized controlled trials. *Endocrine*. 2015;48(1):107–15.
49. Mabileau G, Mieczkowska A, Chappard D. Use of glucagon-like peptide-1 receptor agonists and bone fractures: a meta-analysis of randomized clinical trials. *J Diabetes*. 2014;6(3):260–6.
50. Peng L, Smiley D, Newton C, Pasquel F, Ferreira ME, Umpierrez G. Risk Factors for Inpatient Hypoglycemia during Subcutaneous Insulin. 2012;6(5):1022–9.

51. Nikfar S, Abdollahi M, Salari P. The Efficacy and Tolerability of Exenatide in Comparison to Placebo ; A Systematic Review and Meta-Analysis of Randomized Clinical Trials. *J Pharm Pharm Sci.* 2012;15(1):1–30.
52. Watts N, Bilezikian J, Usiskin K, Edwards R, Desai M, Law G, et al. Effects of Canagliflozin on Fracture Risk in Patients With Type 2 Diabetes Mellitus. *J Clin Endocrinol Metab.* 2016;101(1):157–66.
53. Zhong X, Lai D, Ye Y, Tang Z, Yu B, Huang Y. Efficacy and safety of empagliflozin as add-on to metformin for type 2 diabetes: a systematic review and meta-analysis. *Eur J Clin Pharmacol.* 2016;72:655–63.
54. Liakos A, Karagiannis T, Athanasiadou E, Sarigianni M, Mainou M, Papatheodorou K, et al. Efficacy and safety of empagliflozin for type 2 diabetes: a systematic review and meta-analysis. *Diabetes Obes Metab.* 2014;16(984-93).
55. Vasilakou D, Karagiannis T, Athanasiadou E, Mainou M, Liakos A. Sodium-glucose cotransporter 2 inhibitors for Type 2 Diabetes: A systematic review and meta-analysis. *Ann Intern Med.* 2015;159:262–74.
56. Musso G, Gambino R, Cassader M, Pagano G. A novel approach to control hyperglycemia in type 2 diabetes: Sodium glucose co-transport (SGLT) inhibitors. Systematic review and meta-analysis of randomized trials. *Ann Med.* 2012;44(4):375-93.
57. Yang X-P, Lai D, Zhong K-Y, Shen H-P, Huang Y-L. Efficacy and safety of canagliflozin in subjects with type 2 diabetes: systematic review and meta-analysis. *Eur J Clin Pharmacol.* 2014;70(10):1149–58.
58. Kaur K, Likar N, Dang A. Efficacy and safety of canagliflozin among patients with type 2 diabetes mellitus: A systematic review and meta-analysis. *Indian J Endocr Metab.* 2015;19:705–21.

## Appendix 5. Targets from the various diabetes guidelines

| Guideline                                       | Targets                                                                                                                                                                                                                                                                                                                                                                                                                                                                                                                                                                                                                                                                                                                                                                                                                                                                                                            | Comments                                                                                                                                                                                                                                                                                                                                                                                                                                                                                     |
|-------------------------------------------------|--------------------------------------------------------------------------------------------------------------------------------------------------------------------------------------------------------------------------------------------------------------------------------------------------------------------------------------------------------------------------------------------------------------------------------------------------------------------------------------------------------------------------------------------------------------------------------------------------------------------------------------------------------------------------------------------------------------------------------------------------------------------------------------------------------------------------------------------------------------------------------------------------------------------|----------------------------------------------------------------------------------------------------------------------------------------------------------------------------------------------------------------------------------------------------------------------------------------------------------------------------------------------------------------------------------------------------------------------------------------------------------------------------------------------|
| Canadian Diabetes Association[1,2]              | <p><b>Healthy elderly</b>- same as younger population (<math>A1C \leq 7\%</math>, fasting 4-5 mmol/L, 2 hour post prandial 5-10 mmol/L)</p> <p><b>Frail elderly:</b> while avoiding symptomatic hyperglycemia, <math>A1C \leq 8.5\%</math>, fasting or preprandial 5-12 mmol/L, depending on level of frailty</p> <p><b>Elderly with cognitive impairment:</b> strictly prevent hypoglycemia and less stringent A1C target but not defined</p>                                                                                                                                                                                                                                                                                                                                                                                                                                                                     | Individualized, higher A1C targets are recommended for those with limited life expectancy, high level of functional dependency, extensive coronary artery disease or high risk of ischemia events, multiple co-morbidities, history of recurrent severe hypoglycemia, hypoglycemia unawareness, longstanding diabetes for whom it is difficult to achieve $A1C < 7\%$ , despite effective doses of multiple antihyperglycemic agents, including intensified basal-bolus dose insulin therapy |
| Diabetes Care Program of Nova Scotia (DCPNS)[3] | <p><b>Frail elderly:</b></p> <ul style="list-style-type: none"> <li><input type="checkbox"/> Maintain <math>A1C \geq 8\%</math></li> <li><input type="checkbox"/> Below 8%- discontinue or decrease diabetes treatment</li> <li><input type="checkbox"/> <math>\geq 8\%</math> to <math>&lt;12\%</math>-acceptable if asymptomatic</li> <li><input type="checkbox"/> Above 12%- consider increasing diabetes treatment</li> </ul> <p>Random Blood Glucose</p> <ul style="list-style-type: none"> <li><input type="checkbox"/> <math>&lt;7</math> mmol/L- decrease diabetes treatment</li> <li><input type="checkbox"/> 7-9.9 mmol/L may be acceptable but consider risk of hypoglycemia; if hypoglycemia occurs decrease treatment</li> <li><input type="checkbox"/> 10-20- acceptable in the absence of reversible symptoms</li> <li><input type="checkbox"/> frequently above 20 - increase treatment</li> </ul> | Guidelines were developed for severely frail elderly population specifically (Clinical Frailty Scale $>7$ and requiring assistance with activities of daily living) State stringent targets should be avoided and specify discontinuation of treatments if $A1C < 8\%$ or random glucose $< 7$ mmol/L                                                                                                                                                                                        |

|                                                                     |                                                                                                                                                                                                                                                                                                                                                                                                                                                                                                                                                                                                           |  |
|---------------------------------------------------------------------|-----------------------------------------------------------------------------------------------------------------------------------------------------------------------------------------------------------------------------------------------------------------------------------------------------------------------------------------------------------------------------------------------------------------------------------------------------------------------------------------------------------------------------------------------------------------------------------------------------------|--|
| <p>European Diabetes Working Party for Older People (EDWPOP)[4]</p> | <p><b>Elderly with single system involvement</b> (free of other major co-morbidities): A1C 7-7.5% (precise target will depend on existing cardiovascular risk, presence of microvascular complications, and ability to self-manage)</p> <p>Fasting glucose of 6.5-7.7 mmol/l can be regarded as good control</p> <p><b>Frail (dependent, multisystem disease, care home residency, including those with dementia):</b> A1C of 7.6-8.5% (patients where risk of hypoglycemia is high)</p> <p>Fasting glucose range of 7.6-9.0 mmol/l should minimize risk of hypoglycemia and metabolic decompensation</p> |  |
| <p>American Geriatrics Society[5]</p>                               | <p><b>Older adults:</b> A1C 7.5-8%</p> <p>A1C &lt; 6.5%- potential harm</p> <p><b>Healthy older adults with few comorbidities and good functional status:</b> A1C 7-7.5% may be appropriate if can be safely achieved</p> <p><b>Older adults with multiple comorbidities, poor health, and limited life expectancy:</b> A1C 8-9% appropriate</p>                                                                                                                                                                                                                                                          |  |

|                                             |                                                                                                                                                                                                                                                                                                                                                                                                                                                                                                                                                                                                                                                                                                                                                      |                                                                 |
|---------------------------------------------|------------------------------------------------------------------------------------------------------------------------------------------------------------------------------------------------------------------------------------------------------------------------------------------------------------------------------------------------------------------------------------------------------------------------------------------------------------------------------------------------------------------------------------------------------------------------------------------------------------------------------------------------------------------------------------------------------------------------------------------------------|-----------------------------------------------------------------|
| <p>American Diabetes Association[6]</p>     | <p><b>Healthy</b> (few coexisting chronic illnesses, intact cognitive and functional status)</p> <p>A1C &lt;7.5% (a lower goal may be set if achievable without recurrent or severe hypoglycemia or undue treatment burden)</p> <p><b>Complex/intermediate</b> (multiple coexisting chronic illnesses or 2+ instrumental ADL impairments or mild to moderate cognitive impairment)</p> <p>A1C &lt;8%</p> <p><b>Very complex/poor health</b> (long-term care or end-stage chronic illnesses or moderate to severe cognitive impairment or 2+ ADL dependence)</p> <p>A1C &lt;8.5% (looser glycemic targets than this may expose patients to acute risks from glycosuria, dehydration, hyperglycemic hyperosmolar syndrome, and poor wound healing)</p> |                                                                 |
| <p>International Diabetes Federation[7]</p> | <p><b>1. Functionally independent</b> (living independently, have no important impairments of ADL, and who are receiving none or minimal care support)<br/>A1C 7-7.5%</p> <p><b>2. Functionally dependent</b> (due to loss of function have impairments of ADL): A1C 7-8%</p> <p><b>A Frail</b> (combination of significant fatigue, recent weight loss, severe restriction in mobility and strength, increased propensity to falls, and increased risk of institutionalization): up to 8.5% may be appropriate</p> <p><b>B Dementia:</b> up to 8.5% may be appropriate</p> <p><b>3. End of life care:</b> avoid symptomatic hyperglycemia</p>                                                                                                       | <p>End of life (IDF) target to 9-15 mmol/L (which is ~9.0%)</p> |



## References

1. Imran SA, Rabasa-Lhoret R, Ross S. Targets for glycemic control. *Can J Diabetes*. 2013;37(Suppl 1):S31–4.
2. Meneilly G, Knip A, Tessier D. Diabetes in the elderly. In: Canadian Diabetes Association 2013 Clinical Practice Guidelines for the Prevention and Management of Diabetes in Canada. 2013. p. S184–190.
3. Mallery LH, Ransom T, Steeves B, Cook B, Dunbar P, Moorhouse P. Evidence-informed guidelines for treating frail older adults with type 2 diabetes: from the Diabetes Care Program of Nova Scotia (DCPNS) and the Palliative and Therapeutic Harmonization (PATH) program. *J Am Med Dir Assoc*. 2013;14(11):801–8.
4. Sinclair A, Morley JE, Rodriguez-Mañas L, Paolisso G, Bayer T, Zeyfang A, et al. Diabetes Mellitus in Older People : Position Statement on behalf of the International Association of Gerontology and Geriatrics (IAGG), the European Diabetes Working Party for Older People (EDWPOP), and the International Task Force of Experts in Diabetes. *J Am Med Dir Assoc*. 2012;13(6):388–94.
5. American Geriatrics Society Expert Panel on the Care of Older Adults with Diabetes, Mellitus. Guidelines Abstracted from the American Geriatrics Society Guidelines for Improving the Care of Older Adults with Diabetes Mellitus: 2013 Update. *J Am Ger*. 2014;61(11):2020–6.
6. American Diabetes Association. Older adults. *Diabetes Care*. 2015;38(Suppl 1):S67–9.
7. Sinclair A, Dunning T, Colagiuri S. IDF global guideline for managing older people with type 2 diabetes. Sydney, Australia; 2013.

**Appendix 6.** Glycemic targets for varying patient frailty status

|                       | <b>Organization A1C Suggestions</b>                                                          |                                                          |            |                                                              |                 |
|-----------------------|----------------------------------------------------------------------------------------------|----------------------------------------------------------|------------|--------------------------------------------------------------|-----------------|
| <b>Patient Status</b> | <b>CDA</b>                                                                                   | <b>PATH</b>                                              | <b>ADA</b> | <b>AGS</b>                                                   | <b>IDF</b>      |
| Healthy aged          | ≤7%                                                                                          | N/A                                                      | N/A        | 7.5-8.0% (not <7.5 with <6.5 associated with potential harm) | 7-7.5% (not <7) |
| CFS 4-5               | 7.1-8.5% (depending on level of frailty,                                                     | N/A                                                      | N/A        | N/A                                                          | N/A             |
| CFS 6+                | however, preventing hypoglycemia should take priority over lowering A1C to less than target. | 8-12% (if A1C < 8%, decrease or stop diabetes treatment) | <8.5%      | 8-9%                                                         | ≤8.5%           |
| CI or dementia        | Avoid Symptoms                                                                               | N/A                                                      | NA         | N/A                                                          | 8.5%            |
| End of life           | Avoid Symptoms                                                                               | 8-12% & avoid symptoms                                   | N/A        | N/A                                                          | Avoid Symptoms  |

**CFS**= Clinical Frailty Scale; **ADA**=American Diabetes Association; **IDF**= International Diabetes Federation; **AGS**= American Geriatrics Society; **CDA**= Canadian Diabetes Association; **PATH**= Palliative and Therapeutic Harmonization Program

**Appendix 7.** Antihyperglycemics, their A1C lowering effect and likelihood to cause hypoglycemia (Adapted from CDA guidelines)

| <b>DRUG</b>                                                               | <b>A1C<br/>LOWERING<br/>EFFECT</b> | <b>CAUSES<br/>HYPOGLYCEMIA?</b>                                                                        |
|---------------------------------------------------------------------------|------------------------------------|--------------------------------------------------------------------------------------------------------|
| <b>Metformin</b>                                                          | 1.0-1.5%                           | No                                                                                                     |
| <b>Sulfonylureas</b>                                                      | 0.8%                               | Yes (highest risk with glyburide and chlorpropamide; lower risk with short and long-acting gliclazide) |
| <b>Insulin</b>                                                            | 0.9-1.1%                           | Yes (highest risk with regular insulin and NPH insulin)                                                |
| <b>Dipeptidyl<br/>peptidase 4 (DPP-4)<br/>inhibitors</b>                  | 0.7%                               | No                                                                                                     |
| <b>Glucagon-like<br/>peptide 1 (GLP-1)<br/>agonists</b>                   | 1.0%                               | No                                                                                                     |
| <b>Thiazolidinediones</b>                                                 | 0.8%                               | No                                                                                                     |
| <b>Alpha-glucosidase<br/>inhibitor</b>                                    | 0.6%                               | No                                                                                                     |
| <b>Meglitinides</b>                                                       | 0.7%                               | Yes (minimal/moderate risk)                                                                            |
| <b>Sodium-glucose<br/>linked transporter<br/>2 (SGLT2)<br/>inhibitors</b> | 0.7-1.0%                           | No                                                                                                     |

**Appendix 8. Drug interactions that may lead to hypoglycemia[139]**

| <b>Antihyperglycemic</b> | <b>Added Medications that increase risk of hypoglycemia</b>                                                                                                                                                                                                |
|--------------------------|------------------------------------------------------------------------------------------------------------------------------------------------------------------------------------------------------------------------------------------------------------|
| Repaglinide              | Decreased metabolism via CYP 3A4 inhibition – amiodarone, azole antifungals, ciprofloxacin, clarithromycin, erythromycin, cyclosporine, diltiazem, gemfibrozil<br>Decreased metabolism via CYP 2C8 inhibition – clopidogrel, trimethoprim/sulfamethoxazole |
| Sulfonylureas            | Decreased metabolism via 2C9 inhibition – Amiodarone, sulfamethoxazole/trimethoprim, fluvastatin<br>Hypoglycemia with cimetidine, clarithromycin, EtOH, fluconazole, fluoxetine, MAOIs, metronidazole, NSAIDs, quinolones, salicylates & sulfonamides      |

**Reference**

RxFiles. Diabetes Treatment Charts [Internet]. 2016. Available from: <http://www.rxfiles.ca/rxfiles/uploads/documents/members/cht-diabetes.pdf>

**Appendix 9.** Drugs that may be associated with hypoglycemia in patients with diabetes

| <b>Drug/drug class</b>                         |
|------------------------------------------------|
| Angiotensin-converting enzyme (ACE) inhibitors |
| Beta-blockers                                  |
| Ethanol or Alcohol                             |
| Monoamine Oxidase Inhibitors                   |
| Pentamidine                                    |
| Quinine                                        |
| Quinolone antibiotics                          |
| Salicylates                                    |

**References**

- Vue M, Setter S. Drug-Induced Glucose Alterations Part 1: Drug-Induced Hypoglycemia. Diabetes Spectr. 2011;24(3):171–7.
- Murad M, Al. E. Drug-Induced Hypoglycemia: A Systematic Review. J Clin Endocrinol Metab. 2009;94(3):741–5.

**Appendix 10.** Drugs that may be associated with hyperglycemia in patients with diabetes

| <b>Drug/drug class</b>                                                      |
|-----------------------------------------------------------------------------|
| Atypical antipsychotics (risk may be highest with olanzapine and clozapine) |
| Beta-blockers (except carvedilol and nebivolol)                             |
| Calcineurin inhibitors (cyclosporine, sirolimus, tacrolimus)                |
| Corticosteroids                                                             |
| Protease inhibitors                                                         |
| Quinolone antibiotics (most commonly gatifloxacin)                          |
| Thiazide and thiazide-like diuretics                                        |

**Reference**

Rehman A, Setter S, Vue M. Drug-induced glucose alterations part 2: drug-induced hyperglycemia. Diabetes Spectr. 2011;24(4):234–8.
